# Supplementary material for: International patterns and trends of childhood and adolescent cancer, 1978-2012
Source: PubMed Central journal article supplement — J Natl Cancer Cent. 2022 Feb 14;2(2):78–89. doi: 10.1016/j.jncc.2022.02.001 (PMC11256536; doi:10.1016/j.jncc.2022.02.001), 2022-02-14
Supplement: mmc1.pdf [file mmc1.pdf]

## Supplementary materials

### International patterns and trends of childhood and adolescent cancer, 1978-2012

Yawen Zhao, Peiyuan Sun, Jingyuan Xiao, Lan Jin, Ning Ma, Zhe Li, Guoshuang Feng, Huang Huang, Nicole C. Deziel, Xiaomei Ma, Xin Ni, Yawei Zhang

#### Supplementary Table 1

Registries of this study.

| Country          | Numbers of registries | Name of Registry                                                                                                                                                             | Period    | Populations (0-14 years) | Populations (15-10 years) |
|------------------|-----------------------|------------------------------------------------------------------------------------------------------------------------------------------------------------------------------|-----------|--------------------------|---------------------------|
| USA              | 8                     | USA, California, San Francisco; USA, Connecticut; USA, Georgia, Atlanta; USA, Iowa; USA, Michigan, Detroit; USA, New Mexico; USA, Utah; USA, Washington, Seattle             | 1978-2012 | 183029561                | 61972851                  |
| USA, Hawaii      | 1                     | USA, Hawaii                                                                                                                                                                  | 1978-2012 | 7886382                  | 2671282                   |
| Canada           | 8                     | Canada, Alberta; Canada, British Columbia; Canada, Manitoba; Canada, New Brunswick; Canada, Nova Scotia; Canada, Prince Edward Island; Canada, Ontario; Canada, Saskatchewan | 1978-2012 | 147387969                | 53987865                  |
| Colombia         | 1                     | Colombia, Cali                                                                                                                                                               | 1977-2012 | 23137966                 | 7801703                   |
| China            | 1                     | China, Shanghai City                                                                                                                                                         | 1978-2012 | 27919252                 | 13752509                  |
| China, Hong Kong | 1                     | China, Hong Kong                                                                                                                                                             | 1978-2012 | 39665400                 | 16182300                  |
| India            | 2                     | India, Mumbai; India, Chennai                                                                                                                                                | 1978-2012 | 139771666                | 49498332                  |
| Israel           | 1                     | Israel                                                                                                                                                                       | 1977-2012 | 67738220                 | 19364028                  |
| Japan            | 4                     | Japan, Hiroshima City; Japan, Miyagi Prefecture; Japan, Nagasaki City; Japan, Osaka Prefecture                                                                               | 1978-2012 | 77454453                 | 30352666                  |
| Kuwait           | 1                     | Kuwait                                                                                                                                                                       | 1979-2012 | 19460186                 | 4974180                   |
| France           | 4                     | France, Bas-Rhin; France, Calvados; France, Doubs; France, Isere                                                                                                             | 1978-2012 | 22141176                 | 8055180                   |
| Germany          | 1                     | Germany, Saarland                                                                                                                                                            | 1978-2012 | 5408451                  | 2288805                   |
| Italy            | 3                     | Italy, Parma Province; Italy, Ragusa Province; Italy, Varese Province                                                                                                        | 1978-2012 | 7796847                  | 3059876                   |
| Slovakia         | 1                     | Slovakia                                                                                                                                                                     | 1978-2010 | 38330405                 | 38330405                  |
| Slovenia         | 1                     | Slovenia                                                                                                                                                                     | 1978-2012 | 12689895                 | 4755221                   |
| Spain            | 2                     | Spain, Navarra; Spain, Tarragona                                                                                                                                             | 1978-2012 | 6446614                  | 2460675                   |
| Switzerland      | 3                     | Switzerland, Geneva; Switzerland, Neuchatel; Switzerland, Vaud                                                                                                               | 1978-2012 | 6619303                  | 2431997                   |

|             |   |                                                                                                            |           |           |          |
|-------------|---|------------------------------------------------------------------------------------------------------------|-----------|-----------|----------|
| UK          | 1 | UK, Scotland                                                                                               | 1978-2012 | 84344888  | 30961198 |
| Denmark     | 1 | Denmark                                                                                                    | 1978-2012 | 34060407  | 12066187 |
| Iceland     | 1 | Iceland                                                                                                    | 1973-2012 | 2587905   | 874573   |
| Norway      | 1 | Norway                                                                                                     | 1978-2012 | 30595096  | 10572919 |
| Australia   | 5 | Australia, New South Wales; Australia, South; Australia, Tasmania; Australia, Victoria; Australia, Western | 1978-2012 | 101646712 | 35459800 |
| New Zealand | 1 | New Zealand; (New Zealand Maori+New Zealand Non-Maori)                                                     | 1978-2012 | 29857588  | 10429808 |

---

**Supplementary Table 2.1**

Age standardized incidence rates (per 1,000,000 person-years) of leukemia among children aged 0-14 years during the period of 1978-2012.

|                                | 1978-1982 | 1983-1987 | 1988-1992 | 1993-1997 | 1998-2002 | 2003-2007 | 2008-2012 | APPC | 95% CI     |
|--------------------------------|-----------|-----------|-----------|-----------|-----------|-----------|-----------|------|------------|
| Americas                       |           |           |           |           |           |           |           |      |            |
| USA                            | 38.99     | 41.37     | 43.38     | 39.43     | 48.44     | 47.49     | 37.48     | 0.1  | -9.9-11.4  |
| USA, Hawaii                    | 34.55     | 58.64     | 46.18     | 53.82     | 48.91     | 48.36     | 42.33     | 0.7  | -1.3-2.8   |
| Canada                         | 43.26     | 48.81     | 44.99     | 47.63     | 49.07     | 50.44     | 55.27     | 2.7  | 1.4-4.1    |
| Colombia                       | 43.30     | 39.37     | 42.92     | 58.52     | 55.22     | 52.34     | 59.62     | 8.1  | 3.7-12.6   |
| Asia                           |           |           |           |           |           |           |           |      |            |
| China                          | 42.75     | 42.21     | 34.72     | 38.10     | 30.41     | 34.27     | 39.48     | -1.6 | -3.4-0.2   |
| China, Hong Kong               | 62.72     | 71.26     | 58.12     | 43.40     | 43.16     | 54.03     | 55.93     | 11.4 | 3.9-19.5   |
| India                          | 22.22     | 25.67     | 24.80     | 31.04     | 32.94     | 34.87     | 34.54     | 8.1  | 6.5-9.8    |
| Israel                         | 25.65     | 23.89     | 26.10     | 29.62     | 35.45     | 40.47     | 37.42     | 9.0  | 2.8-15.7   |
| Japan                          | 39.24     | 38.87     | 37.40     | 41.63     | 34.27     | 44.78     | 48.00     | 3.8  | -2.2-10.1  |
| Kuwait                         | 22.16     | 30.33     | 31.58     | 30.43     | 68.26     | 51.69     | 51.63     | 15.5 | 1.3-31.7   |
| Europe, Other                  |           |           |           |           |           |           |           |      |            |
| France                         | 37.73     | 28.21     | 32.31     | 35.62     | 36.34     | 49.83     | 50.54     | 7.5  | 1.6-13.7   |
| Germany                        | 30.92     | 41.68     | 29.70     | 54.45     | 37.04     | 45.08     | 48.85     | 5.5  | -5.6-17.9  |
| Italy                          | 50.95     | 42.00     | 49.33     | 39.41     | 69.47     | 55.16     | 53.39     | 3.5  | -10.8-20.1 |
| Slovakia                       | 39.72     | 32.51     | 39.03     | 35.12     | 38.52     | 43.76     | 45.40     | 4.1  | 2.4-5.9    |
| Slovenia                       | 31.99     | 34.12     | 39.91     | 35.06     | 44.60     | 41.21     | 45.00     | 6.6  | 5.5-7.6    |
| Spain                          | 47.40     | 34.12     | 39.16     | 49.43     | 43.68     | 46.51     | 40.13     | 1.8  | -1.9-5.6   |
| Switzerland                    | 35.50     | 45.18     | 34.48     | 49.92     | 46.26     | 42.30     | 53.21     | 4.5  | -2.5-12.1  |
| UK                             | 40.12     | 38.57     | 43.54     | 46.19     | 49.52     | 48.57     | 44.61     | 2.1  | -0.3-4.6   |
| Europe, Scandinavian Countries |           |           |           |           |           |           |           |      |            |
| Denmark                        | 37.40     | 50.22     | 45.92     | 43.74     | 48.37     | 49.36     | 48.87     | 2.6  | 0.2-5      |
| Iceland                        | 38.88     | 47.63     | 44.03     | 24.02     | 37.62     | 33.90     | 56.97     | 1.4  | -8.9-12.8  |
| Norway                         | 40.72     | 45.68     | 37.13     | 43.10     | 47.71     | 49.92     | 46.45     | 2.2  | -1.6-6     |
| Oceania                        |           |           |           |           |           |           |           |      |            |
| Australia                      | 49.79     | 44.17     | 48.91     | 46.66     | 52.54     | 58.20     | 56.88     | 3.6  | 0.4-7      |
| New Zealand                    | 42.45     | 52.28     | 48.12     | 51.33     | 52.94     | 50.63     | 57.55     | 3.2  | 0.1-6.4    |

Abbreviation: APPC, average period percentage change.

**Supplementary Table 2.2**

Age standardized incidence rates (per 1,000,000 person-years) of CNS tumor among children aged 0-14 years during the period of 1978-2012.

|                                | 1978-1982 | 1983-1987 | 1988-1992 | 1993-1997 | 1998-2002 | 2003-2007 | 2008-2012 | APPC  | 95% CI     |
|--------------------------------|-----------|-----------|-----------|-----------|-----------|-----------|-----------|-------|------------|
| Americas                       |           |           |           |           |           |           |           |       |            |
| USA                            | 26.16     | 28.76     | 33.22     | 29.76     | 34.84     | 31.82     | 36.36     | 5.0   | 0.4-9.8    |
| USA, Hawaii                    | 20.72     | 32.26     | 31.72     | 33.41     | 34.59     | 26.44     | 26.02     | 2.1   | -3.3-7.8   |
| Canada                         | 25.64     | 31.20     | 31.58     | 30.36     | 26.39     | 30.01     | 35.66     | 3.0   | -3.1-9.6   |
| Colombia                       | 18.45     | 20.83     | 13.66     | 16.24     | 19.97     | 20.51     | 21.80     | 0.7   | -3.7-5.2   |
| Asia                           |           |           |           |           |           |           |           |       |            |
| China                          | 16.75     | 16.60     | 22.61     | 21.20     | 17.19     | 16.20     | 18.06     | -0.3  | -3.3-2.8   |
| China, Hong Kong               | 13.12     | 24.32     | 23.53     | 24.19     | 20.08     | 22.52     | 20.46     | 3.1   | -2.1-8.6   |
| India                          | 8.46      | 10.94     | 11.28     | 13.99     | 15.52     | 13.36     | 14.10     | 9.1   | 4.1-14.3   |
| Israel                         | 22.25     | 28.15     | 23.25     | 24.73     | 25.70     | 28.81     | 30.61     | 3.4   | 2.2-4.7    |
| Japan                          | 21.14     | 22.96     | 21.59     | 17.84     | 17.46     | 20.70     | 20.08     | -2.4  | -5.8-1.1   |
| Kuwait                         | 8.85      | 12.73     | 16.69     | 19.71     | 18.08     | 15.15     | 10.91     | 6.0   | 1-11.3     |
| Europe, Other                  |           |           |           |           |           |           |           |       |            |
| France                         | 23.70     | 22.31     | 26.05     | 21.74     | 20.69     | 18.01     | 23.19     | -5.2  | -7.4--2.9  |
| Germany                        | 18.11     | 39.95     | 30.74     | 43.36     | 29.12     | 45.70     | 27.84     | 5.3   | -11.1-24.7 |
| Italy                          | 28.15     | 29.74     | 28.24     | 36.38     | 32.26     | 32.38     | 24.39     | -1.7  | -10.4-7.9  |
| Slovakia                       | 22.39     | 31.05     | 24.83     | 26.30     | 23.22     | 23.26     | 36.41     | 0.5   | -10.6-13   |
| Slovenia                       | 21.78     | 16.76     | 18.59     | 26.34     | 20.09     | 25.25     | 28.56     | 6.8   | -2.3-16.7  |
| Spain                          | 29.44     | 27.91     | 20.68     | 25.13     | 31.88     | 28.42     | 19.44     | -4.9  | -7.1--2.6  |
| Switzerland                    | 17.28     | 25.33     | 18.32     | 31.93     | 24.16     | 17.28     | 12.77     | -3.8  | -4.7--2.9  |
| UK                             | 23.67     | 30.56     | 31.07     | 25.48     | 18.36     | 20.86     | 21.06     | -2.4  | -7.7-3.1   |
| Europe, Scandinavian Countries |           |           |           |           |           |           |           |       |            |
| Denmark                        | 28.32     | 35.61     | 33.56     | 37.60     | 20.85     | 16.25     | 17.86     | -10.4 | -21.5-2.4  |
| Iceland                        | 26.87     | 31.69     | 22.02     | 46.18     | 15.19     | 21.54     | 14.78     | -11.4 | -37.3-25.3 |
| Norway                         | 31.92     | 40.07     | 34.38     | 40.52     | 23.09     | 32.50     | 27.36     | -4.2  | -16.5-10   |
| Oceania                        |           |           |           |           |           |           |           |       |            |
| Australia                      | 27.91     | 26.64     | 27.57     | 31.00     | 24.46     | 21.38     | 24.39     | -4.1  | -5.9--2.3  |
| New Zealand                    | 35.89     | 34.28     | 35.39     | 31.83     | 23.05     | 20.64     | 21.05     | -9.6  | -15.7--3.1 |

Abbreviations: APPC, average period percentage change; CNS, central nervous system.

**Supplementary Table 2.3**

Age standardized incidence rates (per 1,000,000 person-years) of lymphoma among children aged 0-14 years during the period of 1978-2012.

|                                | 1978-1982 | 1983-1987 | 1988-1992 | 1993-1997 | 1998-2002 | 2003-2007 | 2008-2012 | APPC  | 95% CI      |
|--------------------------------|-----------|-----------|-----------|-----------|-----------|-----------|-----------|-------|-------------|
| Americas                       |           |           |           |           |           |           |           |       |             |
| USA                            | 15.16     | 16.17     | 14.30     | 13.48     | 15.17     | 15.38     | 19.22     | 1.6   | -2.0-5.4    |
| USA, Hawaii                    | 9.84      | 22.52     | 7.78      | 11.90     | 16.77     | 9.73      | 25.92     | 8.1   | -12.5- 33.6 |
| Canada                         | 16.67     | 16.31     | 16.66     | 14.98     | 15.38     | 16.53     | 17.67     | 1.0   | -2.7-4.9    |
| Colombia                       | 20.42     | 16.59     | 25.03     | 19.51     | 17.14     | 22.80     | 18.90     | 1.5   | -8.3-12.3   |
| Asia                           |           |           |           |           |           |           |           |       |             |
| China                          | 11.25     | 13.09     | 12.25     | 13.88     | 12.32     | 11.93     | 9.64      | -1.6  | -4.4-1.2    |
| China, Hong Kong               | 17.60     | 17.12     | 16.97     | 12.72     | 10.85     | 9.18      | 10.04     | -11.5 | -16--6.7    |
| India                          | 11.48     | 12.50     | 13.15     | 13.42     | 16.05     | 11.27     | 12.89     | 0.4   | -6.5-7.8    |
| Israel                         | 25.21     | 20.28     | 25.42     | 25.29     | 22.29     | 25.48     | 29.66     | 3.2   | -2.5-9.3    |
| Japan                          | 10.49     | 14.12     | 13.02     | 12.47     | 11.56     | 10.99     | 10.75     | -2.0  | -3.1--1     |
| Kuwait                         | 15.76     | 27.00     | 30.09     | 18.08     | 27.66     | 25.37     | 18.59     | 2.5   | -11.6-18.7  |
| Europe, Other                  |           |           |           |           |           |           |           |       |             |
| France                         | 17.92     | 18.93     | 18.56     | 22.14     | 17.81     | 15.77     | 25.10     | 5.1   | 2.5-7.7     |
| Germany                        | 18.44     | 18.67     | 23.28     | 15.76     | 13.38     | 12.87     | 13.33     | -7.1  | -10.9--3.2  |
| Italy                          | 19.32     | 17.92     | 18.46     | 30.37     | 44.48     | 23.11     | 31.43     | 11.8  | -6.4-33.5   |
| Slovakia                       | 20.78     | 21.93     | 20.83     | 17.51     | 20.32     | 15.93     | 18.39     | -4.4  | -11.9-3.8   |
| Slovenia                       | 16.14     | 19.69     | 18.07     | 19.77     | 20.42     | 18.00     | 21.16     | 2.5   | -2-7.1      |
| Spain                          | 19.74     | 18.19     | 24.75     | 19.94     | 24.42     | 26.31     | 31.59     | 8.2   | 5.9-10.5    |
| Switzerland                    | 12.22     | 17.96     | 22.40     | 32.24     | 22.34     | 12.85     | 22.86     | 9.0   | -8.3-29.5   |
| UK                             | 13.48     | 12.79     | 14.44     | 12.32     | 15.22     | 12.01     | 15.31     | 2.1   | -3.6-8      |
| Europe, Scandinavian Countries |           |           |           |           |           |           |           |       |             |
| Denmark                        | 14.55     | 13.40     | 11.17     | 16.01     | 13.29     | 15.29     | 22.34     | 5.5   | -5.6-17.9   |
| Iceland                        | 10.85     | 9.45      | 6.28      | 21.61     | 5.89      | 11.94     | 14.97     | -9.5  | -18.7-0.6   |
| Norway                         | 12.04     | 13.55     | 9.49      | 14.57     | 13.56     | 15.35     | 22.48     | 11.3  | 7.4-15.3    |
| Oceania                        |           |           |           |           |           |           |           |       |             |
| Australia                      | 16.28     | 14.39     | 16.49     | 16.90     | 15.06     | 15.91     | 18.88     | 2.3   | -3.4-8.4    |
| New Zealand                    | 16.41     | 13.37     | 16.70     | 16.74     | 10.14     | 13.70     | 13.64     | -2.3  | -14.1-11.1  |

Abbreviation: APPC, average period percentage change.

**Supplementary Table 2.4**

Age-standardized incidence rates (per 1,000,000 person-years) of kidney cancer among children aged 0-14 years during the period of 1978-2012.

|                                | 1978-1982 | 1983-1987 | 1988-1992 | 1993-1997 | 1998-2002 | 2003-2007 | 2008-2012 | APPC  | 95% CI     |
|--------------------------------|-----------|-----------|-----------|-----------|-----------|-----------|-----------|-------|------------|
| Americas                       |           |           |           |           |           |           |           |       |            |
| USA                            | 9.51      | 9.42      | 9.25      | 9.54      | 9.35      | 7.40      | 9.16      | -1.9  | -9.6-6.5   |
| USA, Hawaii                    | 7.89      | 9.38      | 3.59      | 3.01      | 3.26      | 4.95      | 1.53      | -20.4 | -43.5-12.3 |
| Canada                         | 7.51      | 10.01     | 8.83      | 9.23      | 9.07      | 8.42      | 8.20      | -0.5  | -1.4-0.5   |
| Colombia                       | 6.84      | 8.10      | 6.47      | 4.30      | 5.95      | 7.43      | 4.92      | -6.1  | -20.8-11.4 |
| Asia                           |           |           |           |           |           |           |           |       |            |
| China                          | 3.06      | 3.09      | 4.77      | 4.77      | 5.16      | 3.00      | 3.55      | 2.1   | -3.1-7.5   |
| China, Hong Kong               | 8.18      | 5.73      | 3.13      | 3.06      | 1.92      | 4.17      | 4.32      | -8.1  | -23.7-10.8 |
| India                          | 4.23      | 4.64      | 3.48      | 4.76      | 4.80      | 3.88      | 3.28      | 7.7   | 2.1-13.6   |
| Israel                         | 7.95      | 6.40      | 4.81      | 6.01      | 7.39      | 7.72      | 7.29      | 0.3   | -5.1-6.1   |
| Japan                          | 4.86      | 5.14      | 5.12      | 3.70      | 3.51      | 2.98      | 3.63      | -8.3  | -13.9--2.4 |
| Kuwait                         | 5.16      | 5.78      | 2.36      | 5.38      | 17.82     | 4.57      | 6.26      | 9.4   | 1.9-17.5   |
| Europe, Other                  |           |           |           |           |           |           |           |       |            |
| France                         | 10.99     | 10.35     | 10.03     | 10.48     | 11.22     | 7.83      | 6.75      | -5.6  | -7.4--3.7  |
| Germany                        | 9.55      | 13.43     | 6.35      | 6.25      | 7.00      | 1.40      | 9.22      | -10.1 | -34.6-23.7 |
| Italy                          | 6.90      | 9.17      | 7.89      | 11.25     | 11.43     | 10.32     | 10.33     | 6.7   | 4.7-8.7    |
| Slovakia                       | 7.97      | 6.36      | 7.10      | 8.60      | 8.55      | 10.83     | 8.62      | 7.7   | -0.9-17    |
| Slovenia                       | 6.83      | 5.89      | 3.64      | 12.32     | 15.19     | 8.21      | 5.30      | -10.2 | -20.9-1.9  |
| Spain                          | 6.32      | 2.49      | 7.42      | 9.40      | 5.67      | 9.12      | 12.16     | 18.1  | 1.2-37.9   |
| Switzerland                    | 8.78      | 4.97      | 5.59      | 9.23      | 6.75      | 6.65      | 5.62      | 0.9   | -4.1-6.1   |
| UK                             | 8.23      | 8.55      | 7.70      | 6.36      | 7.65      | 7.09      | 8.03      | -0.7  | -3.5-2.3   |
| Europe, Scandinavian Countries |           |           |           |           |           |           |           |       |            |
| Denmark                        | 9.14      | 12.18     | 5.85      | 7.51      | 8.05      | 5.53      | 9.57      | -5.5  | -17.9-8.8  |
| Iceland                        | 8.00      | 3.19      | 0.00      | 9.01      | 9.29      | 3.20      | 5.84      | 8.5   | -12.1-34.1 |
| Norway                         | 8.04      | 7.59      | 5.90      | 7.56      | 7.82      | 8.49      | 7.05      | -0.3  | -5.7-5.4   |
| Oceania                        |           |           |           |           |           |           |           |       |            |
| Australia                      | 7.62      | 7.97      | 7.62      | 9.04      | 8.91      | 8.98      | 8.45      | 4.1   | 2.8-5.5    |
| New Zealand                    | 6.87      | 12.49     | 9.35      | 8.30      | 9.41      | 7.94      | 7.06      | -3.9  | -9.7-2.4   |

Abbreviation: APPC, average period percentage change.

**Supplementary Table 2.5**

Age-standardized incidence rates (per 1,000,000 person-years) of bone cancer among children aged 0-14 years during the period of 1978-2012.

|                                | 1978-1982 | 1983-1987 | 1988-1992 | 1993-1997 | 1998-2002 | 2003-2007 | 2008-2012 | APPC | 95% CI     |
|--------------------------------|-----------|-----------|-----------|-----------|-----------|-----------|-----------|------|------------|
| Americas                       |           |           |           |           |           |           |           |      |            |
| USA                            | 6.87      | 6.91      | 6.76      | 6.22      | 6.57      | 6.51      | 8.07      | 1.9  | -5.2-9.5   |
| USA, Hawaii                    | 1.97      | 13.43     | 2.94      | 9.72      | 5.63      | 5.83      | 9.57      | 12.9 | -6.8- 36.8 |
| Canada                         | 7.21      | 7.54      | 6.35      | 6.68      | 7.54      | 7.14      | 6.72      | 3.7  | 1-6.4      |
| Colombia                       | 4.00      | 5.23      | 4.91      | 4.47      | 5.63      | 9.31      | 7.36      | 10   | -6-28.7    |
| Asia                           |           |           |           |           |           |           |           |      |            |
| China                          | 2.30      | 4.41      | 4.38      | 5.40      | 4.80      | 4.94      | 5.34      | 9.6  | 5-14.5     |
| China, Hong Kong               | 5.33      | 7.04      | 6.27      | 6.45      | 6.23      | 6.54      | 6.00      | 0.2  | -2.2-2.5   |
| India                          | 4.36      | 4.67      | 4.46      | 3.37      | 5.25      | 4.72      | 5.68      | 6.2  | 3.2-9.3    |
| Israel                         | 7.14      | 6.56      | 6.33      | 7.92      | 9.86      | 6.43      | 8.87      | 4.3  | -7.9-18.1  |
| Japan                          | 3.51      | 5.34      | 4.92      | 4.84      | 4.98      | 4.52      | 4.32      | 0.8  | -1.5-3.1   |
| Kuwait                         | 8.37      | 6.12      | 4.13      | 6.28      | 9.84      | 6.32      | 5.46      | -4.5 | -13.3-5.3  |
| Europe, Other                  |           |           |           |           |           |           |           |      |            |
| France                         | 8.39      | 7.29      | 5.88      | 7.22      | 7.64      | 6.17      | 6.77      | -2.9 | -8-2.4     |
| Germany                        | 9.50      | 3.80      | 3.93      | 5.86      | 10.71     | 2.39      | 11.06     | 8.8  | -24.2-56.3 |
| Italy                          | 6.42      | 8.32      | 5.90      | 12.34     | 3.68      | 9.30      | 10.68     | 7    | -13.4-32.2 |
| Slovakia                       | 4.61      | 4.44      | 5.53      | 6.27      | 9.82      | 8.14      | 10.64     | 18   | 3.9-34     |
| Slovenia                       | 7.03      | 6.02      | 4.05      | 5.43      | 3.87      | 4.69      | 6.32      | -2   | -22.3-23.7 |
| Spain                          | 9.87      | 10.34     | 2.43      | 14.11     | 9.12      | 8.70      | 6.90      | 3.8  | -2.1-10    |
| Switzerland                    | 7.15      | 10.02     | 2.25      | 8.62      | 15.36     | 10.19     | 5.41      | 4.2  | -23.9-42.7 |
| UK                             | 6.93      | 4.95      | 5.65      | 5.12      | 6.97      | 9.60      | 7.50      | 2.1  | -8.8-14.3  |
| Europe, Scandinavian Countries |           |           |           |           |           |           |           |      |            |
| Denmark                        | 5.44      | 5.86      | 5.64      | 7.68      | 6.21      | 7.90      | 7.63      | 7.4  | 5.9-9      |
| Iceland                        | 9.17      | 6.26      | 6.29      | 0.00      | 6.01      | 8.84      | 9.13      | 0.9  | -9.8-13    |
| Norway                         | 5.54      | 6.05      | 3.73      | 8.50      | 9.83      | 5.14      | 7.02      | 8.5  | 3.8-13.4   |
| Oceania                        |           |           |           |           |           |           |           |      |            |
| Australia                      | 6.31      | 6.52      | 5.22      | 7.27      | 6.36      | 6.74      | 6.07      | 2.6  | 0.2-5      |
| New Zealand                    | 6.72      | 7.49      | 6.90      | 8.69      | 8.13      | 8.99      | 9.90      | 5.8  | 2.1-9.7    |

Abbreviation: APPC, average period percentage change.

### Supplementary Table 3.1

Age standardized incidence rates (per 1,000,000 person-years) of leukemia among children aged 0-14 years during the period of 1978-2012 by gender.

|                                | 1978-1982 |        | 1983-1987 |        | 1988-1992 |        | 1993-1997 |        | 1998-2002 |        | 2003-2007 |        | 2008-2012 |        | APPC |        | 95% CI     |            |  |
|--------------------------------|-----------|--------|-----------|--------|-----------|--------|-----------|--------|-----------|--------|-----------|--------|-----------|--------|------|--------|------------|------------|--|
|                                | Male      | Female | Male | Female | Male       | Female     |  |
| Americas                       |           |        |           |        |           |        |           |        |           |        |           |        |           |        |      |        |            |            |  |
| USA                            | 40.64     | 37.27  | 44.82     | 37.79  | 46.59     | 40.23  | 42.82     | 35.86  | 51.97     | 44.76  | 52.31     | 42.43  | 41.10     | 33.84  | 2.2  | 1.3    | -6.9-12.2  | -0.3-3.0   |  |
| USA, Hawaii                    | 30.67     | 38.68  | 51.72     | 69.02  | 52.08     | 39.91  | 58.38     | 49.00  | 48.93     | 48.88  | 45.77     | 51.10  | 44.22     | 40.39  | 3.8  | -2.3   | 0.7-7.0    | -7.8-3.6   |  |
| Canada                         | 45.21     | 41.20  | 52.97     | 44.43  | 48.65     | 41.15  | 48.68     | 46.53  | 55.35     | 42.47  | 55.90     | 44.69  | 57.38     | 53.04  | 2.9  | 6.9    | 0.3-8.3    | 2.7-3.5    |  |
| Colombia                       | 51.56     | 35.00  | 39.51     | 39.30  | 39.84     | 45.92  | 57.39     | 59.50  | 61.45     | 48.72  | 46.26     | 58.68  | 61.01     | 58.12  | 5.7  | 11.6   | -27.3-29   | -4.6-3.7   |  |
| Asia                           |           |        |           |        |           |        |           |        |           |        |           |        |           |        |      |        |            |            |  |
| China                          | 42.51     | 42.99  | 46.20     | 37.98  | 40.12     | 29.26  | 44.84     | 30.09  | 34.99     | 25.58  | 33.17     | 35.43  | 42.87     | 35.83  | 7.4  | -2.0   | -16.3-10.5 | -14.2-6.9  |  |
| China, Hong Kong               | 78.07     | 46.26  | 80.88     | 60.87  | 67.39     | 48.10  | 42.56     | 44.28  | 47.20     | 38.86  | 64.51     | 42.81  | 61.07     | 50.40  | 2.4  | -3.9   | -16.2-1.5  | -27.3-9.2  |  |
| India                          | 29.08     | 14.94  | 31.87     | 19.19  | 29.32     | 20.19  | 38.66     | 22.93  | 37.78     | 27.68  | 40.16     | 29.06  | 41.02     | 27.39  | 8.8  | 11.4   | -3.9-6.8   | 1.6-8.7    |  |
| Israel                         | 26.77     | 24.47  | 24.10     | 23.69  | 30.33     | 21.63  | 34.60     | 24.38  | 38.67     | 32.07  | 43.78     | 36.99  | 42.63     | 31.95  | 10.9 | 6.9    | -5.9-11.9  | -17-17.6   |  |
| Japan                          | 43.20     | 35.07  | 43.01     | 34.51  | 41.16     | 33.44  | 44.36     | 38.76  | 39.88     | 28.39  | 43.39     | 46.23  | 47.61     | 48.41  | -0.3 | 6.6    | -13.6-8.8  | -10.7-27.1 |  |
| Kuwait                         | 24.23     | 20.03  | 33.59     | 26.81  | 37.33     | 25.78  | 38.09     | 22.48  | 70.28     | 66.08  | 60.44     | 42.48  | 56.84     | 46.09  | 16.2 | 14.7   | -5.6-17.1  | -5.9-11.4  |  |
| Europe, Other                  |           |        |           |        |           |        |           |        |           |        |           |        |           |        |      |        |            |            |  |
| France                         | 43.59     | 31.52  | 32.78     | 23.41  | 32.18     | 32.45  | 40.28     | 30.74  | 39.36     | 33.15  | 48.65     | 51.10  | 57.67     | 43.00  | 5.8  | 10.0   | 4.5-25.2   | -4.8-15.7  |  |
| Germany                        | 40.18     | 21.30  | 55.18     | 27.67  | 30.11     | 29.24  | 60.38     | 48.23  | 54.92     | 18.26  | 50.08     | 39.82  | 53.28     | 44.19  | 2.5  | 25.6   | 3.3-117.4  | -4.1-28.1  |  |
| Italy                          | 46.81     | 55.32  | 52.19     | 31.25  | 57.48     | 40.75  | 36.38     | 42.57  | 49.25     | 90.75  | 61.35     | 48.64  | 60.50     | 45.84  | 9.9  | 5.9    | -27.1-21.6 | -69.4-6.7  |  |
| Slovakia                       | 39.37     | 40.08  | 34.45     | 30.49  | 45.39     | 32.39  | 40.98     | 28.98  | 39.51     | 37.48  | 50.59     | 36.58  | 57.78     | 32.37  | 7.0  | 0.8    | 4.7-21.6   | -6.1-23    |  |
| Slovenia                       | 33.18     | 30.76  | 42.12     | 25.63  | 36.73     | 43.25  | 40.42     | 29.41  | 37.70     | 51.87  | 38.52     | 44.06  | 43.83     | 46.24  | 2.0  | 11.0   | 12.6-16.9  | 11.9-33.4  |  |
| Spain                          | 58.51     | 35.59  | 39.88     | 28.03  | 39.45     | 38.84  | 62.66     | 35.34  | 45.88     | 41.30  | 47.27     | 45.68  | 45.02     | 34.93  | -0.3 | 5.1    | -9.7-15.2  | -18.6-6    |  |
| Switzerland                    | 37.32     | 33.64  | 44.16     | 46.38  | 38.80     | 29.84  | 51.78     | 47.84  | 47.91     | 44.57  | 44.62     | 39.84  | 41.77     | 65.25  | 2.2  | 7.5    | -56.3--0.6 | -53.8-117  |  |
| UK                             | 43.37     | 36.69  | 39.26     | 37.85  | 50.75     | 35.96  | 53.99     | 38.02  | 51.94     | 46.98  | 55.90     | 40.87  | 47.73     | 41.34  | 2.2  | 2.5    | -4.3-15.9  | -1.5-13.6  |  |
| Europe, Scandinavian Countries |           |        |           |        |           |        |           |        |           |        |           |        |           |        |      |        |            |            |  |
| Denmark                        | 41.59     | 33.00  | 52.01     | 48.34  | 51.10     | 40.49  | 48.43     | 38.81  | 51.24     | 45.35  | 49.40     | 49.31  | 51.68     | 45.90  | 1.9  | 3.4    | -5-8.2     | -16.9-10.3 |  |
| Iceland                        | 54.61     | 22.37  | 55.83     | 39.01  | 36.91     | 51.46  | 23.42     | 24.65  | 30.22     | 45.26  | 42.26     | 25.21  | 58.60     | 55.19  | 1.3  | 9.8    | -25-24.4   | 1.4-28.5   |  |
| Norway                         | 47.37     | 33.72  | 44.31     | 47.12  | 40.79     | 33.28  | 45.08     | 41.01  | 49.12     | 46.23  | 50.37     | 49.45  | 48.28     | 44.51  | 1.4  | 3.3    | 1.7-26.9   | -6.1-38.6  |  |
| Oceania                        |           |        |           |        |           |        |           |        |           |        |           |        |           |        |      |        |            |            |  |
| Australia                      | 56.65     | 42.62  | 48.88     | 39.29  | 55.54     | 41.94  | 48.73     | 44.48  | 55.79     | 49.12  | 63.33     | 52.80  | 64.52     | 48.85  | 3.1  | 4.2    | 2.1-8.8    | 2.2-7.3    |  |
| New Zealand                    | 48.35     | 36.29  | 61.66     | 42.43  | 53.76     | 42.23  | 54.44     | 48.06  | 64.82     | 40.39  | 44.85     | 56.70  | 66.55     | 48.08  | 2.0  | 5.3    | 3.5-18.6   | -3.1-9.6   |  |

Abbreviation: APPC, average period percentage change.



### Supplementary Table 3.2

Age standardized incidence rates (per 1,000,000 person-years) of CNS tumor among children aged 0-14 years during the period of 1978-2012 by gender.

|                                | 1978-1982 |        | 1983-1987 |        | 1988-1992 |        | 1993-1997 |        | 1998-2002 |        | 2003-2007 |        | 2008-2012 |        | APPC  |        | 95% CI     |             |  |
|--------------------------------|-----------|--------|-----------|--------|-----------|--------|-----------|--------|-----------|--------|-----------|--------|-----------|--------|-------|--------|------------|-------------|--|
|                                | Male      | Female | Male  | Female | Male       | Female      |  |
| Americas                       |           |        |           |        |           |        |           |        |           |        |           |        |           |        |       |        |            |             |  |
| USA                            | 22.74     | 24.51  | 30.50     | 27.80  | 36.03     | 30.27  | 33.51     | 25.83  | 35.39     | 34.25  | 34.09     | 29.45  | 37.57     | 34.61  | 4.7   | 8.6    | 2.3-7.0    | 5.8-11.5    |  |
| USA, Hawaii                    | 28.84     | 12.16  | 30.67     | 36.08  | 36.10     | 27.05  | 31.67     | 35.25  | 40.71     | 28.12  | 31.99     | 20.50  | 29.04     | 22.84  | -0.1  | 2.5    | -8.9-9.5   | -4.8-10.4   |  |
| Canada                         | 28.21     | 22.95  | 33.68     | 28.60  | 34.33     | 28.71  | 32.51     | 28.10  | 27.82     | 24.90  | 31.74     | 28.19  | 37.39     | 33.84  | 2.2   | 4.0    | -4.2-9.1   | -1.9-10.2   |  |
| Colombia                       | 19.27     | 17.68  | 23.76     | 18.09  | 14.40     | 12.91  | 15.22     | 17.31  | 18.85     | 21.11  | 20.51     | 20.50  | 22.67     | 20.85  | -0.8  | 2.4    | -3.6-2.1   | 0.5-4.4     |  |
| Asia                           |           |        |           |        |           |        |           |        |           |        |           |        |           |        |       |        |            |             |  |
| China                          | 18.38     | 15.02  | 15.52     | 17.74  | 24.09     | 21.11  | 24.68     | 18.20  | 17.95     | 16.42  | 17.17     | 15.19  | 19.98     | 16.00  | -12.8 | -0.7   | -20.9--3.9 | -3.7-2.5    |  |
| China, Hong Kong               | 15.74     | 10.29  | 25.00     | 23.57  | 24.19     | 22.82  | 27.41     | 20.73  | 23.97     | 15.93  | 24.72     | 20.17  | 19.75     | 21.27  | 2.6   | 4.6    | -1.6-7     | -4.2-14.2   |  |
| India                          | 9.51      | 7.38   | 11.85     | 9.97   | 13.89     | 8.63   | 16.34     | 11.51  | 19.04     | 11.73  | 15.37     | 11.14  | 16.93     | 10.97  | 9.5   | 6.1    | 2.6-16.8   | 4.7-7.5     |  |
| Israel                         | 22.05     | 22.47  | 27.88     | 28.44  | 24.26     | 22.18  | 28.28     | 20.98  | 29.63     | 21.56  | 31.71     | 25.77  | 32.54     | 28.57  | 5.6   | 1.1    | 4.8-6.4    | -1.3-3.6    |  |
| Japan                          | 23.74     | 18.39  | 25.35     | 20.42  | 20.91     | 22.31  | 19.32     | 16.29  | 17.89     | 17.01  | 21.87     | 19.48  | 20.30     | 19.85  | -4.0  | -0.4   | -8.8-0.9   | -2.3-1.6    |  |
| Kuwait                         | 7.53      | 10.22  | 15.51     | 9.79   | 15.92     | 17.47  | 18.18     | 21.32  | 19.80     | 16.26  | 20.52     | 9.52   | 12.91     | 8.83   | 11.1  | -2.0   | -3.4-27.8  | -10.1-6.9   |  |
| Europe, Other                  |           |        |           |        |           |        |           |        |           |        |           |        |           |        |       |        |            |             |  |
| France                         | 27.43     | 19.77  | 22.99     | 21.60  | 25.97     | 26.12  | 29.76     | 13.33  | 22.03     | 19.27  | 19.33     | 16.61  | 24.41     | 21.92  | -1.7  | 7.2    | -11.6-9.2  | 1.5-13.3    |  |
| Germany                        | 10.26     | 26.27  | 33.25     | 46.97  | 24.92     | 36.93  | 46.64     | 39.87  | 40.08     | 17.66  | 56.44     | 34.52  | 28.17     | 27.52  | 18.4  | -4.7   | -1.8-42.7  | -23.2-18.3  |  |
| Italy                          | 27.97     | 28.34  | 30.04     | 29.39  | 30.55     | 25.81  | 40.24     | 32.27  | 43.25     | 20.66  | 23.66     | 41.55  | 34.32     | 13.85  | 6.7   | 3.1    | 3.3-10.2   | -1.5-7.8    |  |
| Slovakia                       | 28.09     | 16.45  | 30.83     | 31.29  | 24.86     | 24.80  | 29.51     | 22.94  | 26.73     | 19.51  | 26.76     | 19.57  | 43.67     | 28.77  | 8.7   | -1.6   | 4.9-12.7   | -12-10      |  |
| Slovenia                       | 27.67     | 15.45  | 19.27     | 14.10  | 19.22     | 17.90  | 30.06     | 22.42  | 25.19     | 14.72  | 29.33     | 20.93  | 31.40     | 25.52  | 5.6   | 9.1    | -0.5-12.1  | -4-23.9     |  |
| Spain                          | 33.10     | 25.56  | 31.38     | 24.04  | 24.37     | 16.76  | 31.05     | 18.77  | 32.57     | 31.20  | 36.74     | 19.61  | 21.57     | 17.13  | -4.7  | -5.7   | -7.3--2.1  | -8.4--3     |  |
| Switzerland                    | 4.54      | 30.59  | 20.70     | 30.21  | 13.43     | 23.35  | 43.95     | 19.41  | 19.16     | 29.43  | 20.88     | 13.45  | 8.87      | 16.86  | 11.9  | -2.3   | -4.3-31    | -6.2-1.9    |  |
| UK                             | 21.63     | 25.81  | 30.00     | 31.16  | 28.90     | 33.35  | 26.28     | 24.64  | 19.94     | 16.71  | 24.22     | 17.34  | 22.15     | 19.91  | 0.0   | -4.8   | -4.8-4.9   | -11.7-2.6   |  |
| Europe, Scandinavian Countries |           |        |           |        |           |        |           |        |           |        |           |        |           |        |       |        |            |             |  |
| Denmark                        | 31.30     | 25.18  | 34.64     | 36.61  | 32.83     | 34.34  | 43.84     | 31.06  | 21.25     | 20.42  | 16.64     | 15.83  | 14.69     | 21.19  | -14.8 | -8.6   | -22.9--5.8 | -20.4-4.9   |  |
| Iceland                        | 18.47     | 35.69  | 18.71     | 45.36  | 43.13     | 0.00   | 42.04     | 50.56  | 11.73     | 18.78  | 24.06     | 18.90  | 23.20     | 6.01   | 3.0   | 0.5    | -5.5-12.2  | -33.1--0.7  |  |
| Norway                         | 33.76     | 30.00  | 45.58     | 34.28  | 39.66     | 28.84  | 41.38     | 39.61  | 23.37     | 22.80  | 33.28     | 31.70  | 23.50     | 31.43  | -7.2  | -0.8   | -19.9-7.4  | -13.7-14    |  |
| Oceania                        |           |        |           |        |           |        |           |        |           |        |           |        |           |        |       |        |            |             |  |
| Australia                      | 31.24     | 24.42  | 27.09     | 26.17  | 27.33     | 27.82  | 31.82     | 30.14  | 27.17     | 21.61  | 21.66     | 21.09  | 23.71     | 25.11  | -3.4  | -1.2   | -8.6-2.1   | -10.6-9.2   |  |
| New Zealand                    | 35.67     | 36.12  | 38.32     | 30.01  | 37.54     | 33.14  | 34.32     | 29.21  | 28.45     | 17.34  | 19.54     | 21.81  | 23.23     | 18.76  | -9.0  | -15.5  | -16.8--0.6 | -19.1--11.8 |  |

Abbreviations: APPC, average period percentage change; CNS, central nervous system.

### Supplementary Table 3.3

Age standardized incidence rates (per 1,000,000 person-years) of lymphoma among children aged 0-14 years during the period of 1978-2012 by gender.

|                  | 1978-1982 |        | 1983-1987 |        | 1988-1992 |        | 1993-1997 |        | 1998-2002 |        | 2003-2007 |        | 2008-2012 |        | APPC |        | 95% CI     |            |
|------------------|-----------|--------|-----------|--------|-----------|--------|-----------|--------|-----------|--------|-----------|--------|-----------|--------|------|--------|------------|------------|
|                  | Male      | Female | Male | Female | Male       | Female     |
| USA              | 20.50     | 9.59   | 21.02     | 11.11  | 18.69     | 9.69   | 16.44     | 10.38  | 18.34     | 11.83  | 18.86     | 11.74  | 23.74     | 14.62  | 0.1  | 5.0    | -3.6-3.6   | 1.1-9.0    |
| USA, Hawaii      | 13.36     | 6.09   | 35.41     | 8.89   | 11.22     | 4.12   | 16.86     | 6.64   | 23.32     | 9.84   | 10.91     | 8.46   | 35.24     | 16.08  | 6.8  | 24.4   | -16.5-36.7 | -6-21.8    |
| Canada           | 20.91     | 12.21  | 22.54     | 9.76   | 21.11     | 11.99  | 18.16     | 11.64  | 19.95     | 10.57  | 21.76     | 11.03  | 22.63     | 12.42  | 0.3  | 1.2    | -1.5-0.9   | 6.2-45.7   |
| Colombia         | 27.80     | 13.00  | 23.69     | 9.54   | 37.94     | 11.83  | 24.39     | 14.66  | 22.51     | 11.56  | 32.33     | 13.04  | 26.53     | 11.07  | 1.2  | 2.3    | -9.2-12.9  | -4.6-9.7   |
| China            | 16.07     | 6.14   | 17.27     | 8.66   | 16.17     | 8.28   | 16.40     | 11.63  | 17.15     | 7.29   | 14.16     | 9.63   | 12.97     | 6.12   | 3.0  | 2.0    | -7.5-1.7   | -11-16.9   |
| China, Hong Kong | 23.56     | 11.21  | 22.64     | 11.16  | 23.18     | 10.25  | 14.23     | 11.11  | 16.72     | 4.53   | 13.23     | 4.86   | 11.85     | 8.09   | 4.5  | -1.3   | -7.2--1.8  | -5.5-3     |
| India            | 17.37     | 5.27   | 18.20     | 6.53   | 18.31     | 7.85   | 18.80     | 7.69   | 22.32     | 9.24   | 16.86     | 5.08   | 17.27     | 8.07   | 0.9  | 5.6    | -5.6-4.1   | -10.5-24.7 |
| Israel           | 35.30     | 14.57  | 28.25     | 11.88  | 32.27     | 18.19  | 31.82     | 18.41  | 29.03     | 15.20  | 30.86     | 19.82  | 36.47     | 22.51  | 0.7  | 8.9    | -4.4-6     | 0.9-17.4   |
| Japan            | 13.33     | 7.50   | 16.04     | 12.09  | 16.91     | 8.93   | 15.76     | 9.01   | 14.29     | 8.70   | 13.82     | 8.02   | 14.69     | 6.62   | -0.2 | -5.6   | -3.3-3     | -8.5--2.5  |
| Kuwait           | 21.82     | 9.48   | 37.52     | 15.80  | 39.42     | 20.69  | 21.99     | 14.01  | 40.33     | 14.60  | 28.19     | 22.44  | 24.33     | 12.60  | 0.1  | 7.8    | -13-15.1   | -14.4-35.7 |
| France           | 21.95     | 13.66  | 28.48     | 8.86   | 23.55     | 13.33  | 29.06     | 14.88  | 22.94     | 12.43  | 16.95     | 14.53  | 30.60     | 19.33  | 0.7  | 8.1    | -14.6-18.6 | -1.2-18.3  |
| Germany          | 29.41     | 7.04   | 15.96     | 21.66  | 35.39     | 10.53  | 21.44     | 9.79   | 16.42     | 10.15  | 20.49     | 4.90   | 17.42     | 9.07   | 2.7  | -10.3  | -10.5-5.8  | -25.8-8.3  |
| Italy            | 28.27     | 9.84   | 23.73     | 11.80  | 24.32     | 12.31  | 29.81     | 30.95  | 48.18     | 40.63  | 34.34     | 11.21  | 37.49     | 25.00  | 8.0  | 20.7   | -5.8-23.9  | 10.6-31.9  |
| Slovakia         | 29.92     | 11.23  | 27.36     | 16.26  | 25.67     | 15.79  | 24.16     | 10.55  | 20.97     | 19.63  | 17.77     | 14.00  | 23.63     | 12.87  | 8.4  | 1.1    | -9.4--7.4  | -20.4-28.4 |
| Slovenia         | 23.43     | 8.36   | 27.08     | 11.83  | 29.50     | 6.02   | 23.15     | 16.22  | 27.64     | 12.78  | 27.18     | 8.26   | 28.88     | 12.97  | 1.9  | 4.3    | -1.6-5.6   | -9.4-20.2  |
| Spain            | 24.49     | 14.64  | 25.72     | 10.27  | 34.87     | 13.89  | 24.43     | 15.17  | 39.54     | 8.31   | 33.84     | 18.38  | 44.56     | 17.85  | 6.1  | 5.9    | 2.9-9.4    | -11-26     |
| Switzerland      | 19.17     | 4.99   | 22.53     | 13.18  | 30.84     | 13.60  | 43.94     | 19.94  | 32.08     | 12.08  | 19.63     | 5.71   | 32.37     | 12.85  | 15.9 | 9.3    | 9.8-22.5   | -10.6-33.6 |
| UK               | 17.67     | 9.07   | 16.89     | 8.48   | 17.14     | 11.61  | 16.07     | 8.39   | 20.66     | 9.50   | 16.96     | 6.82   | 20.16     | 10.22  | 2.2  | 1.8    | -3-7.7     | -5.9-10.2  |
| Denmark          | 19.13     | 9.76   | 19.01     | 7.55   | 17.05     | 5.02   | 22.79     | 8.89   | 18.62     | 7.67   | 17.81     | 12.65  | 29.77     | 14.55  | 0.4  | 7.3    | -2.9-3.8   | -2.6-18.2  |
| Iceland          | 15.20     | 6.29   | 12.19     | 6.52   | 12.30     | 0.00   | 36.04     | 6.38   | 11.52     | 0.00   | 23.39     | 0.00   | 23.40     | 6.13   | 12.6 | 1.7    | -11.8-43.7 | 1.5-5.1    |
| Norway           | 15.26     | 8.65   | 17.89     | 9.01   | 11.68     | 7.19   | 21.43     | 7.35   | 18.18     | 8.68   | 20.20     | 10.23  | 29.15     | 15.48  | 15.0 | 4.6    | 9.4-20.7   | 1.3-8      |
| Australia        | 23.06     | 9.17   | 19.11     | 9.47   | 23.00     | 9.64   | 21.09     | 12.49  | 20.82     | 9.02   | 20.44     | 11.15  | 24.89     | 12.55  | 1.3  | 3.60   | -3.4-6.2   | 1.6-5.7    |
| New Zealand      | 20.42     | 12.23  | 15.13     | 11.51  | 20.60     | 12.63  | 20.37     | 12.91  | 12.64     | 7.48   | 17.65     | 9.53   | 17.04     | 10.08  | 1.1  | -5.5   | -12.9-12.2 | -7.8--3.1  |

Abbreviation: APPC, average period percentage change.

### Supplementary Table 3.4

Age standardized incidence rates (per 1,000,000 person-years) of kidney cancer among children aged 0-14 years during the period of 1978-2012 by gender.

|                                | 1978-1982 |        | 1983-1987 |        | 1988-1992 |        | 1993-1997 |        | 1998-2002 |        | 2003-2007 |        | 2008-2012 |        | APPC |        | 95% CI     |              |
|--------------------------------|-----------|--------|-----------|--------|-----------|--------|-----------|--------|-----------|--------|-----------|--------|-----------|--------|------|--------|------------|--------------|
|                                | Male      | Female | Male | Female | Male       | Female       |
| Americas                       |           |        |           |        |           |        |           |        |           |        |           |        |           |        |      |        |            |              |
| USA                            | 8.75      | 10.31  | 8.83      | 9.82   | 9.20      | 9.30   | 9.08      | 10.03  | 8.43      | 10.32  | 7.02      | 7.81   | 7.99      | 10.01  | 0.3  | -2.30  | -1.5-2.1   | -3.9- -0.7   |
| USA, Hawaii                    | 7.64      | 8.16   | 10.99     | 7.89   | 6.96      | 0.00   | 4.41      | 1.52   | 4.71      | 1.73   | 7.89      | 1.79   | 1.48      | 1.58   | 13.8 | -29.5  | -45.2-35.6 | -33.1- -25.6 |
| Canada                         | 7.09      | 7.96   | 8.79      | 11.29  | 8.59      | 9.08   | 8.30      | 10.22  | 7.84      | 10.36  | 8.24      | 8.60   | 6.75      | 9.73   | -1.2 | 0.4    | -5.3-3     | -4-5.1       |
| Colombia                       | 4.67      | 9.05   | 10.29     | 5.85   | 7.27      | 5.66   | 1.72      | 6.92   | 4.78      | 7.21   | 6.22      | 8.67   | 5.23      | 4.58   | -5.6 | -0.6   | -26.2-20.7 | -16.9-19     |
| Asia                           |           |        |           |        |           |        |           |        |           |        |           |        |           |        |      |        |            |              |
| China                          | 3.77      | 2.30   | 4.76      | 1.31   | 3.85      | 5.70   | 4.14      | 5.49   | 4.86      | 5.46   | 2.68      | 3.33   | 3.02      | 4.10   | -4.9 | -30.9  | -16.5-8.2  | -54.8-5.6    |
| China, Hong Kong               | 9.74      | 6.51   | 6.13      | 5.30   | 3.71      | 2.51   | 2.42      | 3.75   | 2.82      | 0.95   | 3.35      | 5.05   | 5.04      | 3.55   | 11.4 | -18.1  | -15.7--7   | -22--14      |
| India                          | 6.23      | 2.10   | 4.02      | 5.28   | 3.79      | 3.18   | 5.05      | 4.46   | 4.91      | 4.70   | 4.19      | 3.55   | 3.23      | 3.34   | -3.8 | 1.5    | -8.4-0.9   | -4.3-7.8     |
| Israel                         | 7.37      | 8.56   | 6.28      | 6.53   | 3.89      | 5.78   | 5.62      | 6.42   | 6.79      | 8.02   | 7.63      | 7.82   | 7.43      | 7.14   | 1.1  | -0.3   | -3.6-5.9   | -6.9-6.7     |
| Japan                          | 5.35      | 4.35   | 6.32      | 3.90   | 5.38      | 4.85   | 4.58      | 2.79   | 3.69      | 3.32   | 3.96      | 1.96   | 3.21      | 4.06   | 10.1 | -9.6   | -14.9--5.1 | -13.1--5.9   |
| Kuwait                         | 5.57      | 4.74   | 6.25      | 5.28   | 2.34      | 2.38   | 3.50      | 7.35   | 12.01     | 23.76  | 5.32      | 3.80   | 5.68      | 6.86   | 9    | 9.9    | 0.8-17.8   | 1.8-18.5     |
| Europe, Other                  |           |        |           |        |           |        |           |        |           |        |           |        |           |        |      |        |            |              |
| France                         | 9.08      | 13.04  | 10.48     | 10.24  | 12.94     | 6.98   | 9.29      | 11.72  | 13.10     | 9.25   | 6.12      | 9.62   | 6.28      | 7.27   | -3.8 | -5.2   | -23.4-20.7 | -10.4-0.2    |
| Germany                        | 7.99      | 11.15  | 15.54     | 11.18  | 7.42      | 5.21   | 4.73      | 7.84   | 0.00      | 14.29  | 0.00      | 2.85   | 7.36      | 11.16  | 86.4 | -0.2   | 50.7-130.7 | -5.6-5.6     |
| Italy                          | 7.74      | 6.01   | 10.30     | 7.95   | 5.63      | 10.26  | 15.94     | 6.29   | 7.30      | 15.84  | 7.20      | 13.65  | 4.19      | 16.84  | 10.5 | 18.1   | -45.7-47.6 | -0.6-40.3    |
| Slovakia                       | 7.10      | 8.88   | 5.53      | 7.22   | 7.28      | 6.93   | 8.33      | 8.88   | 6.70      | 10.49  | 6.82      | 15.05  | 7.19      | 10.11  | 4.2  | 10.6   | -2-10.8    | -5.4-29.3    |
| Slovenia                       | 8.82      | 4.72   | 5.24      | 6.58   | 5.24      | 1.96   | 11.47     | 13.22  | 15.49     | 14.87  | 8.71      | 7.68   | 5.09      | 5.53   | 11.8 | 34.8   | -11.6-41.4 | 19.9-51.6    |
| Spain                          | 10.60     | 1.78   | 0.00      | 5.17   | 7.23      | 7.64   | 7.77      | 11.14  | 5.42      | 5.92   | 7.87      | 10.44  | 9.81      | 14.65  | -5.2 | 35.8   | -17-8.3    | 12.7-63.5    |
| Switzerland                    | 4.54      | 13.19  | 4.94      | 4.99   | 2.12      | 9.22   | 6.97      | 11.61  | 9.35      | 4.00   | 9.21      | 3.96   | 5.48      | 5.78   | 9.3  | -5.0   | 3.7-15.3   | -27.7-25     |
| UK                             | 6.89      | 9.64   | 10.62     | 6.38   | 6.90      | 8.54   | 7.03      | 5.66   | 9.10      | 6.13   | 7.23      | 6.93   | 7.41      | 8.69   | 0.7  | -1.7   | -5-6.6     | -4-0.6       |
| Europe, Scandinavian Countries |           |        |           |        |           |        |           |        |           |        |           |        |           |        |      |        |            |              |
| Denmark                        | 8.42      | 9.88   | 13.26     | 11.05  | 4.09      | 7.68   | 8.98      | 5.96   | 5.54      | 10.69  | 5.15      | 5.92   | 10.59     | 8.50   | -4.5 | 9.1    | -23.2-18.7 | 1.1-17.7     |
| Iceland                        | 3.13      | 13.12  | 0.00      | 6.52   | 0.00      | 0.00   | 11.71     | 6.16   | 12.47     | 6.02   | 6.29      | 0.00   | 11.36     | 0.00   | 28.6 | -49.5  | 6-56       | -55.6--42.5  |
| Norway                         | 6.79      | 9.34   | 9.77      | 5.28   | 4.34      | 7.54   | 6.27      | 8.92   | 6.52      | 9.20   | 7.15      | 9.89   | 6.88      | 7.23   | -3.6 | 5.3    | -5.9--1.3  | -3.2-14.6    |
| Oceania                        |           |        |           |        |           |        |           |        |           |        |           |        |           |        |      |        |            |              |
| Australia                      | 7.48      | 7.77   | 7.95      | 7.99   | 5.13      | 10.24  | 8.82      | 9.28   | 7.20      | 10.71  | 8.28      | 9.72   | 8.35      | 8.56   | 5.1  | 3.4    | 1.1-9.2    | 0.8-6        |
| New Zealand                    | 8.54      | 5.13   | 11.84     | 13.18  | 6.88      | 11.95  | 8.99      | 7.58   | 9.15      | 9.68   | 6.35      | 9.60   | 5.63      | 8.56   | -8.8 | 2.3    | -15--2.1   | -5.3-10.5    |

Abbreviation: APPC, average period percentage change.

### Supplementary Table 3.5

Age standardized incidence rates (per 1,000,000 person-years) of bone cancer among children aged 0-14 years during the period of 1978-2012 by gender.

|                                | 1978-1982 |        | 1983-1987 |        | 1988-1992 |        | 1993-1997 |        | 1998-2002 |        | 2003-2007 |        | 2008-2012 |        | APPC |        | 95% CI     |             |  |
|--------------------------------|-----------|--------|-----------|--------|-----------|--------|-----------|--------|-----------|--------|-----------|--------|-----------|--------|------|--------|------------|-------------|--|
|                                | Male      | Female | Male | Female | Male       | Female      |  |
| Americas                       |           |        |           |        |           |        |           |        |           |        |           |        |           |        |      |        |            |             |  |
| USA                            | 5.92      | 7.86   | 7.59      | 6.20   | 5.99      | 7.57   | 7.36      | 5.01   | 7.13      | 5.99   | 6.38      | 6.65   | 8.77      | 7.29   | 3.2  | -1.3   | -5-12.1    | -3-0.5      |  |
| USA, Hawaii                    | 0         | 4.04   | 16.46     | 11.01  | 0.00      | 6.05   | 14.13     | 5.02   | 4.81      | 6.49   | 3.37      | 8.47   | 12.48     | 6.53   | 11.9 | -1.8   | -25.4-4.1  | -10.7-16    |  |
| Canada                         | 7.66      | 6.74   | 7.34      | 7.75   | 6.09      | 6.63   | 6.73      | 6.63   | 7.85      | 7.22   | 7.15      | 7.12   | 5.99      | 7.50   | -3.9 | -0.2   | -5.4--2.4  | -2.2-1.8    |  |
| Colombia                       | 4.55      | 3.44   | 7.66      | 2.87   | 6.29      | 3.56   | 4.04      | 4.95   | 5.38      | 5.88   | 10.94     | 7.63   | 6.15      | 8.60   | 5.8  | 20     | -22.6-44.5 | 16.8-23.2   |  |
| Asia                           |           |        |           |        |           |        |           |        |           |        |           |        |           |        |      |        |            |             |  |
| China                          | 2.31      | 2.30   | 4.28      | 4.55   | 3.01      | 5.77   | 5.81      | 5.26   | 3.67      | 5.99   | 4.48      | 5.47   | 5.16      | 5.53   | 7.4  | 11.9   | -7.9-25.3  | 7-17.1      |  |
| China, Hong Kong               | 6.82      | 3.73   | 7.32      | 6.73   | 5.65      | 6.93   | 6.23      | 6.69   | 7.18      | 5.21   | 7.96      | 5.03   | 6.54      | 5.43   | 6.2  | 0.6    | 2.7-9.8    | -6.1-7.8    |  |
| India                          | 3.62      | 5.15   | 4.11      | 5.24   | 5.44      | 3.44   | 3.29      | 3.45   | 5.53      | 4.96   | 5.07      | 4.34   | 7.17      | 4.01   | 12.5 | 0.8    | 8.7-16.4   | -2.7-4.4    |  |
| Israel                         | 6.31      | 8.01   | 6.92      | 6.18   | 6.97      | 5.66   | 9.88      | 5.85   | 10.28     | 9.42   | 6.51      | 6.36   | 10.79     | 6.85   | 9.3  | 0.3    | 5.8-12.9   | -14.5-17.7  |  |
| Japan                          | 2.89      | 4.17   | 5.10      | 5.58   | 4.85      | 4.99   | 5.15      | 4.51   | 5.93      | 3.98   | 5.29      | 3.71   | 4.24      | 4.40   | 5.6  | -3.7   | -2.1-13.9  | -9.3-2.2    |  |
| Kuwait                         | 11.13     | 5.53   | 5.95      | 6.29   | 1.81      | 6.49   | 7.22      | 5.30   | 17.42     | 2.07   | 7.21      | 5.36   | 7.94      | 2.83   | -2.6 | -7.7   | -19.4-17.7 | -27.6-17.5  |  |
| Europe, Other                  |           |        |           |        |           |        |           |        |           |        |           |        |           |        |      |        |            |             |  |
| France                         | 9.73      | 6.98   | 9.72      | 4.74   | 6.60      | 5.12   | 7.06      | 7.39   | 6.63      | 8.69   | 7.22      | 5.06   | 5.60      | 8.01   | -1.4 | 6      | -5.3-2.7   | -9-23.5     |  |
| Germany                        | 5.58      | 13.58  | 7.45      | 0.00   | 5.18      | 2.65   | 4.63      | 7.16   | 16.42     | 4.69   | 4.66      | 0.00   | 9.25      | 12.94  | 28.9 | -1.4   | 15.4-43.9  | -100-700    |  |
| Italy                          | 1.63      | 11.46  | 12.29     | 4.15   | 8.67      | 3.00   | 7.30      | 17.63  | 7.18      | 0.00   | 14.40     | 3.92   | 11.85     | 9.44   | 26.6 | 5.6    | 8.9-47.2   | -16.5-33.5  |  |
| Slovakia                       | 4.65      | 4.57   | 4.91      | 3.95   | 6.66      | 4.35   | 5.95      | 6.60   | 11.35     | 8.23   | 7.25      | 9.07   | 9.56      | 11.78  | 7.7  | 20.2   | 1.7-13.9   | 16.7-23.9   |  |
| Slovenia                       | 7.97      | 6.03   | 5.88      | 6.16   | 4.32      | 3.75   | 3.84      | 7.09   | 2.10      | 5.74   | 2.48      | 7.04   | 8.13      | 4.39   | -1.1 | 1.7    | -13.7-13.3 | -1.4-5      |  |
| Spain                          | 8.73      | 11.10  | 12.31     | 8.27   | 1.57      | 3.34   | 10.35     | 18.12  | 7.49      | 10.85  | 10.64     | 6.70   | 9.16      | 4.58   | -1.4 | -23.1  | -10.3-8.4  | -32.1--12.9 |  |
| Switzerland                    | 4.35      | 10.08  | 13.50     | 6.38   | 2.28      | 2.27   | 7.38      | 9.89   | 16.87     | 13.80  | 7.11      | 13.45  | 5.30      | 5.54   | 1    | 8      | -35.8-58.8 | -18.3-42.9  |  |
| UK                             | 6.09      | 7.82   | 6.35      | 3.47   | 7.34      | 3.87   | 6.01      | 4.19   | 8.30      | 5.58   | 8.34      | 10.93  | 7.85      | 7.13   | 4.4  | 0      | 3.4-5.5    | -18.5-22.8  |  |
| Europe, Scandinavian Countries |           |        |           |        |           |        |           |        |           |        |           |        |           |        |      |        |            |             |  |
| Denmark                        | 4.42      | 6.51   | 5.17      | 6.58   | 5.35      | 5.94   | 7.99      | 7.35   | 6.40      | 6.01   | 6.43      | 9.45   | 6.86      | 8.44   | 6.7  | 1.8    | 1.3-12.4   | -0.7-4.3    |  |
| Iceland                        | 14.99     | 3.06   | 0.00      | 12.87  | 12.34     | 0.00   | 0.00      | 0.00   | 11.73     | 0.00   | 11.70     | 5.88   | 6.12      | 12.26  | -8.1 | 19.4   | -12.9--3   | 2.5-39.1    |  |
| Norway                         | 6.59      | 4.43   | 5.91      | 6.20   | 3.40      | 4.09   | 8.52      | 8.49   | 10.94     | 8.67   | 3.32      | 7.07   | 8.68      | 5.26   | -3.1 | 6.1    | -14.1-9.2  | -1.2-13.8   |  |
| Oceania                        |           |        |           |        |           |        |           |        |           |        |           |        |           |        |      |        |            |             |  |
| Australia                      | 6.62      | 5.99   | 6.69      | 6.34   | 5.22      | 5.23   | 7.55      | 6.98   | 6.09      | 6.64   | 6.63      | 6.87   | 6.58      | 5.53   | 0.8  | 4.6    | -1.2-2.8   | 1.3-7.9     |  |
| New Zealand                    | 7.94      | 5.45   | 8.73      | 6.22   | 6.49      | 7.33   | 7.91      | 9.53   | 7.93      | 8.35   | 9.34      | 8.62   | 10.54     | 9.23   | 8.2  | 8.9    | 4-12.5     | 7.3-10.6    |  |

Abbreviation: APPC, average period percentage change.

**Supplementary Table 4.1**

Incidence rates (per 1,000,000 person-years) of lymphoma among adolescents aged 15-19 years during the period of 1978-2012.

|                                | 1978-1982 | 1983-1987 | 1988-1992 | 1993-1997 | 1998-2002 | 2003-2007 | 2008-2012 | APPC | 95% CI     |
|--------------------------------|-----------|-----------|-----------|-----------|-----------|-----------|-----------|------|------------|
| Americas                       |           |           |           |           |           |           |           |      |            |
| USA                            | 52.98     | 54.39     | 56.55     | 48.83     | 48.09     | 49.17     | 54.95     | 0.1  | -2.4-2.6   |
| USA, Hawaii                    | 17.49     | 23.02     | 33.65     | 25.15     | 28.96     | 32.21     | 40.06     | 15.1 | 8.7-21.8   |
| Canada                         | 42.84     | 56.71     | 59.28     | 56.13     | 55.22     | 53.23     | 54.90     | 2.5  | 1.2-3.9    |
| Colombia                       | 24.16     | 20.03     | 15.68     | 17.56     | 31.92     | 24.77     | 27.80     | 1.1  | -10.7-14.6 |
| Asia                           |           |           |           |           |           |           |           |      |            |
| China                          | 12.35     | 14.40     | 14.62     | 10.25     | 14.94     | 25.31     | 19.82     | 11.3 | 4-19.2     |
| China, Hong Kong               | 20.62     | 30.25     | 31.03     | 22.88     | 27.30     | 23.42     | 26.60     | 0.6  | -5.3-6.8   |
| India                          | 13.88     | 17.12     | 18.25     | 13.32     | 15.18     | 12.05     | 14.63     | -2.2 | -9.1-5.2   |
| Israel                         | 42.81     | 49.09     | 49.93     | 75.22     | 72.41     | 74.00     | 62.67     | 7.1  | -4.2-19.7  |
| Japan                          | 11.76     | 12.89     | 14.15     | 12.98     | 13.20     | 13.03     | 20.68     | 7.1  | 2.5-11.8   |
| Kuwait                         | 40.07     | 18.43     | 36.26     | 33.92     | 52.70     | 43.97     | 56.12     | -1.1 | -27.5-35.1 |
| Europe, Other                  |           |           |           |           |           |           |           |      |            |
| France                         | 49.36     | 41.55     | 42.56     | 42.96     | 48.50     | 52.06     | 68.63     | 5.0  | 0.7-9.4    |
| Germany                        | 30.74     | 34.36     | 46.36     | 67.97     | 46.40     | 57.94     | 51.00     | 12.9 | 6.1-20.1   |
| Italy                          | 50.06     | 51.48     | 58.70     | 55.72     | 61.24     | 101.57    | 100.01    | 13.7 | -0.1-29.3  |
| Slovakia                       | 34.13     | 39.60     | 39.79     | 32.95     | 42.62     | 48.90     | 46.43     | 8.1  | 1.4-15.2   |
| Slovenia                       | 31.28     | 40.26     | 42.68     | 41.37     | 57.74     | 50.12     | 42.03     | 7.1  | -5.8-21.7  |
| Spain                          | 26.61     | 24.19     | 35.02     | 88.48     | 57.52     | 72.20     | 65.18     | 20.1 | -0.8-45.3  |
| Switzerland                    | 41.66     | 32.74     | 38.12     | 53.71     | 68.64     | 36.13     | 64.23     | 0.0  | -16.3-19.5 |
| UK                             | 31.79     | 37.43     | 36.92     | 45.87     | 38.35     | 51.30     | 48.06     | 7.1  | 1.5-13     |
| Europe, Scandinavian Countries |           |           |           |           |           |           |           |      |            |
| Denmark                        | 31.67     | 37.25     | 38.98     | 47.74     | 40.92     | 44.00     | 63.93     | 12.0 | 6.9-17.3   |
| Iceland                        | 13.39     | 37.81     | 37.74     | 104.54    | 75.03     | 82.17     | 51.14     | 29.0 | 16.7-42.5  |
| Norway                         | 24.21     | 28.17     | 42.70     | 45.98     | 46.38     | 53.06     | 55.26     | 16.8 | 12.4-21.4  |
| Oceania                        |           |           |           |           |           |           |           |      |            |
| Australia                      | 31.32     | 34.76     | 39.48     | 41.95     | 47.48     | 57.31     | 62.09     | 12.0 | 10.9-13.1  |
| New Zealand                    | 27.77     | 31.03     | 27.90     | 24.50     | 38.40     | 40.38     | 50.05     | 8.9  | 4.4-13.5   |

Abbreviation: APPC, average period percentage change.

**Supplementary Table 4.2**

Incidence rates (per 1,000,000 person-years) of leukemia among adolescents aged 15-19 years during the period of 1978-2012.

|                                | 1978-1982 | 1983-1987 | 1988-1992 | 1993-1997 | 1998-2002 | 2003-2007 | 2008-2012 | APPC  | 95% CI     |
|--------------------------------|-----------|-----------|-----------|-----------|-----------|-----------|-----------|-------|------------|
| Americas                       |           |           |           |           |           |           |           |       |            |
| USA                            | 20.62     | 22.87     | 23.59     | 21.18     | 29.06     | 30.58     | 24.24     | 6.5   | 2.2-11     |
| USA, Hawaii                    | 22.48     | 9.87      | 15.30     | 27.66     | 24.13     | 44.60     | 18.85     | 2.7   | -19.8-31.6 |
| Canada                         | 20.07     | 27.00     | 22.55     | 23.12     | 24.84     | 25.35     | 29.51     | 3.9   | 1.3-6.5    |
| Colombia                       | 36.95     | 28.04     | 32.67     | 41.38     | 43.15     | 33.38     | 43.68     | -0.6  | -14.7-15.7 |
| Asia                           |           |           |           |           |           |           |           |       |            |
| China                          | 32.34     | 26.13     | 25.43     | 30.76     | 26.82     | 34.93     | 23.95     | 0.9   | -11.1-14.4 |
| China, Hong Kong               | 33.33     | 45.37     | 28.72     | 23.35     | 25.10     | 24.80     | 25.20     | -9.3  | -10.8--7.9 |
| India                          | 18.34     | 22.50     | 20.03     | 26.51     | 23.77     | 21.71     | 22.48     | 2.7   | -0.6-6     |
| Israel                         | 23.59     | 17.91     | 26.54     | 23.75     | 24.39     | 32.81     | 27.67     | 1.3   | -9.7-13.6  |
| Japan                          | 23.24     | 19.85     | 25.02     | 21.22     | 23.52     | 21.99     | 30.16     | -2.1  | -11.7-8.5  |
| Kuwait                         | 30.05     | 34.23     | 23.57     | 47.89     | 16.71     | 38.33     | 30.06     | 3.8   | -5.2-13.7  |
| Europe, Other                  |           |           |           |           |           |           |           |       |            |
| France                         | 19.20     | 21.57     | 19.64     | 15.22     | 30.31     | 35.58     | 31.02     | 10.1  | 4.3-16.3   |
| Germany                        | 8.20      | 24.54     | 21.40     | 37.76     | 21.41     | 17.04     | 54.65     | 26.4  | -6.7-71.3  |
| Italy                          | 42.91     | 39.05     | 43.55     | 53.40     | 27.22     | 19.22     | 26.09     | -7.4  | -14.1--0.2 |
| Slovakia                       | 20.96     | 13.55     | 21.28     | 16.26     | 17.95     | 29.53     | 33.03     | 10.5  | 1.8-19.9   |
| Slovenia                       | 17.38     | 18.40     | 26.16     | 22.69     | 31.76     | 35.57     | 40.12     | 13.9  | 7.9-20.2   |
| Spain                          | 29.27     | 24.19     | 9.34      | 19.13     | 19.17     | 25.11     | 21.73     | -11.0 | -20.6--0.4 |
| Switzerland                    | 30.55     | 16.37     | 26.39     | 17.90     | 15.60     | 25.02     | 7.41      | -7.7  | -34-29     |
| UK                             | 17.42     | 19.41     | 25.73     | 29.31     | 30.80     | 27.48     | 23.55     | 5.4   | -6.4-18.6  |
| Europe, Scandinavian Countries |           |           |           |           |           |           |           |       |            |
| Denmark                        | 22.48     | 23.47     | 19.21     | 24.18     | 19.05     | 29.77     | 22.26     | 2.2   | -2.2-6.8   |
| Iceland                        | 22.32     | 18.90     | 28.30     | 19.01     | 37.51     | 36.52     | 25.57     | 1.4   | -12.1-16.9 |
| Norway                         | 18.48     | 19.78     | 17.21     | 16.32     | 27.68     | 25.85     | 35.39     | 8.7   | 3.9-13.8   |
| Oceania                        |           |           |           |           |           |           |           |       |            |
| Australia                      | 24.14     | 24.43     | 27.97     | 28.76     | 31.27     | 31.14     | 34.45     | 5.2   | 2.3-8.2    |
| New Zealand                    | 22.72     | 30.37     | 29.94     | 25.98     | 32.61     | 35.17     | 40.04     | 12.7  | 1.3-25.3   |

Abbreviation: APPC, average period percentage change.

**Supplementary Table 4.3**

Incidence rates (per 1,000,000 person-years) of thyroid cancer among adolescents aged 15-19 years during the period of 1978-2012.

|                                | 1978-1982 | 1983-1987 | 1988-1992 | 1993-1997 | 1998-2002 | 2003-2007 | 2008-2012 | APPC  | 95% CI     |
|--------------------------------|-----------|-----------|-----------|-----------|-----------|-----------|-----------|-------|------------|
| Americas                       |           |           |           |           |           |           |           |       |            |
| USA                            | 13.05     | 16.67     | 13.71     | 13.48     | 19.14     | 18.48     | 30.82     | 13.7  | 4.4-23.9   |
| USA, Hawaii                    | 19.99     | 13.16     | 24.47     | 25.15     | 12.07     | 19.82     | 21.21     | -2.3  | -16-13.8   |
| Canada                         | 11.20     | 12.79     | 12.91     | 16.30     | 17.64     | 23.43     | 27.16     | 15.0  | 12.9-17.1  |
| Colombia                       | 7.11      | 8.01      | 5.23      | 6.27      | 9.82      | 11.84     | 17.87     | 12.1  | 5.2-19.5   |
| Asia                           |           |           |           |           |           |           |           |       |            |
| China                          | 4.00      | 5.86      | 6.99      | 11.39     | 8.43      | 18.73     | 33.86     | 38.3  | 28.7-48.6  |
| China, Hong Kong               | 8.59      | 8.82      | 15.29     | 18.68     | 13.65     | 15.16     | 23.80     | 15.3  | 5-26.5     |
| India                          | 1.65      | 2.93      | 2.08      | 2.10      | 2.99      | 2.61      | 4.88      | 22.3  | -3.7-55.3  |
| Israel                         | 9.77      | 8.64      | 14.84     | 20.19     | 17.26     | 17.86     | 22.67     | 14.8  | 5.5-24.8   |
| Japan                          | 3.73      | 3.68      | 4.31      | 6.80      | 5.52      | 10.32     | 9.48      | 16.0  | 4.1-29.3   |
| Kuwait                         | 14.02     | 1.32      | 7.25      | 23.94     | 3.86      | 7.89      | 10.02     | -12.8 | -52.5-59.8 |
| Europe, Other                  |           |           |           |           |           |           |           |       |            |
| France                         | 2.74      | 5.59      | 5.73      | 12.53     | 15.59     | 23.43     | 17.86     | 41.9  | 20.3-67.3  |
| Germany                        | 6.15      | 7.36      | 7.13      | 15.10     | 3.57      | 3.41      | 7.29      | 10.6  | -6.1-30.3  |
| Italy                          | 7.15      | 5.33      | 7.57      | 20.90     | 3.40      | 16.47     | 36.96     | 22.9  | -6.7-61.8  |
| Slovakia                       | 2.44      | 2.08      | 6.01      | 7.70      | 13.01     | 10.17     | 16.07     | 39.4  | 12.5-72.8  |
| Slovenia                       | 8.69      | 4.60      | 5.51      | 6.67      | 15.88     | 17.78     | 26.75     | 25.5  | 9.3-44.2   |
| Spain                          | 7.98      | 18.14     | 16.34     | 14.35     | 6.39      | 18.83     | 14.48     | 5.2   | -17.5-34.2 |
| Switzerland                    | 8.33      | 8.18      | 5.86      | 7.16      | 3.12      | 16.68     | 9.88      | 4.5   | -7.1-17.7  |
| UK                             | 3.92      | 5.54      | 2.80      | 7.01      | 8.17      | 7.94      | 10.24     | 16.4  | 9.4-24     |
| Europe, Scandinavian Countries |           |           |           |           |           |           |           |       |            |
| Denmark                        | 3.07      | 6.12      | 3.29      | 5.58      | 7.76      | 7.77      | 8.56      | 14.8  | 8.1-22     |
| Iceland                        | 4.46      | 0.00      | 18.87     | 19.01     | 18.76     | 45.65     | 0.00      | 58.1  | 45-72.3    |
| Norway                         | 7.01      | 5.99      | 9.56      | 9.64      | 11.97     | 8.84      | 7.45      | 1.6   | -12-17.3   |
| Oceania                        |           |           |           |           |           |           |           |       |            |
| Australia                      | 8.91      | 8.27      | 6.21      | 10.39     | 12.93     | 14.56     | 17.23     | 12.5  | 10.6-14.4  |
| New Zealand                    | 4.42      | 7.26      | 6.12      | 3.71      | 13.04     | 8.47      | 8.76      | 21.0  | -0.7-47.4  |

Abbreviation: APPC, average period percentage change.

**Supplementary Table 4.4**

Incidence rates (per 1,000,000 person-years) of CNS tumor among adolescents aged 15-19 years during the period of 1978-2012.

|                                | 1978-1982 | 1983-1987 | 1988-1992 | 1993-1997 | 1998-2002 | 2003-2007 | 2008-2012 | APPC  | 95% CI     |
|--------------------------------|-----------|-----------|-----------|-----------|-----------|-----------|-----------|-------|------------|
| Americas                       |           |           |           |           |           |           |           |       |            |
| USA                            | 17.66     | 21.32     | 23.59     | 17.79     | 18.22     | 20.97     | 21.21     | 1.2   | -1.2-3.6   |
| USA, Hawaii                    | 7.49      | 23.02     | 9.18      | 17.60     | 14.48     | 14.87     | 14.14     | 26.0  | -20.2-98.9 |
| Canada                         | 19.94     | 21.32     | 20.71     | 17.27     | 17.38     | 18.74     | 23.75     | 2.4   | -2.4-7.5   |
| Colombia                       | 9.95      | 12.02     | 6.53      | 11.29     | 17.54     | 8.61      | 11.91     | 9.1   | -1.9-21.4  |
| Asia                           |           |           |           |           |           |           |           |       |            |
| China                          | 13.08     | 14.40     | 19.07     | 13.67     | 22.22     | 22.78     | 8.26      | 9.5   | 1.4-18.2   |
| China, Hong Kong               | 9.96      | 13.44     | 16.21     | 19.61     | 14.09     | 13.78     | 16.80     | 7.0   | -3.8-19.1  |
| India                          | 7.29      | 7.99      | 9.50      | 8.98      | 10.33     | 10.80     | 9.39      | 7.2   | 4.1-10.4   |
| Israel                         | 22.92     | 22.54     | 17.99     | 18.21     | 19.51     | 22.96     | 19.00     | -2.7  | -5.7-0.4   |
| Japan                          | 8.61      | 9.62      | 11.56     | 9.47      | 10.56     | 12.49     | 9.77      | 3.7   | -5.3-13.5  |
| Kuwait                         | 12.02     | 7.90      | 12.69     | 11.97     | 10.28     | 4.51      | 6.01      | -15.8 | -30.6-2.2  |
| Europe, Other                  |           |           |           |           |           |           |           |       |            |
| France                         | 21.02     | 15.98     | 17.19     | 16.11     | 15.59     | 9.55      | 11.28     | -15.4 | -24.4--5.4 |
| Germany                        | 14.35     | 22.09     | 21.40     | 22.66     | 10.71     | 30.67     | 7.29      | 2.0   | -35.1-60.5 |
| Italy                          | 21.45     | 12.43     | 18.93     | 27.86     | 6.80      | 13.73     | 15.22     | -0.9  | -20.3-23.4 |
| Slovakia                       | 13.65     | 23.44     | 21.74     | 26.96     | 14.81     | 14.52     | 30.36     | 3.6   | -19.9-34   |
| Slovenia                       | 5.21      | 14.95     | 15.14     | 12.01     | 17.32     | 19.40     | 15.28     | 14.1  | -0.5-30.9  |
| Spain                          | 7.98      | 36.28     | 16.34     | 26.31     | 22.37     | 21.97     | 21.73     | 2.6   | -0.9-6.2   |
| Switzerland                    | 13.89     | 19.10     | 17.59     | 10.74     | 18.72     | 5.56      | 14.82     | -3.8  | -30.1-32.4 |
| UK                             | 15.24     | 16.17     | 20.69     | 17.84     | 13.20     | 12.21     | 14.66     | -0.9  | -7.8-6.6   |
| Europe, Scandinavian Countries |           |           |           |           |           |           |           |       |            |
| Denmark                        | 22.48     | 28.07     | 17.57     | 29.14     | 13.40     | 20.06     | 13.13     | -8.4  | -22.6-8.5  |
| Iceland                        | 31.24     | 47.26     | 9.43      | 19.01     | 9.38      | 18.26     | 0.00      | -8.1  | -17.5-3.7  |
| Norway                         | 24.21     | 31.17     | 19.12     | 29.67     | 19.45     | 40.81     | 14.90     | 9.8   | -7.7-30.7  |
| Oceania                        |           |           |           |           |           |           |           |       |            |
| Australia                      | 27.01     | 17.85     | 19.74     | 17.98     | 17.37     | 16.03     | 17.76     | -5.5  | -8.7--2.2  |
| New Zealand                    | 31.56     | 21.79     | 12.25     | 17.81     | 14.49     | 15.63     | 12.51     | -12.5 | -17.1--7.6 |

Abbreviations: APPC, average period percentage change; CNS, central nervous system.



**Supplementary Table 4.5**

Incidence rates (per 1,000,000 person-years) of testicular cancer among adolescents aged 15-19 years during the period of 1978-2012.

|                                | 1978-1982 | 1983-1987 | 1988-1992 | 1993-1997 | 1998-2002 | 2003-2007 | 2008-2012 | APPC  | 95% CI     |
|--------------------------------|-----------|-----------|-----------|-----------|-----------|-----------|-----------|-------|------------|
| Americas                       |           |           |           |           |           |           |           |       |            |
| USA                            | 27.97     | 31.07     | 29.74     | 28.3      | 33.49     | 35.44     | 38.92     | 5.9   | 2.2-9.8    |
| USA, Hawaii                    | 14.12     | 18.90     | 23.49     | 29.21     | 23.07     | 46.88     | 36.37     | 21.3  | 14.2-28.9  |
| Canada                         | 21.21     | 28.07     | 26.07     | 31.95     | 31.08     | 32.67     | 40.77     | 9.1   | 3.5-15     |
| Colombia                       | 16.52     | 15.03     | 11.66     | 13.90     | 24.59     | 24.34     | 31.26     | 12.1  | 0.2-25.3   |
| Asia                           |           |           |           |           |           |           |           |       |            |
| China                          | 1.44      | 4.10      | 2.42      | 0.00      | 4.57      | 5.99      | 6.56      | 21.6  | 7.7-37.3   |
| China, Hong Kong               | 6.64      | 3.24      | 4.43      | 9.03      | 11.16     | 14.42     | 12.71     | 22.6  | 11.9-34.4  |
| India                          | 4.29      | 3.03      | 4.73      | 4.16      | 4.47      | 4.83      | 2.96      | -7.8  | -24.4-12.4 |
| Israel                         | 7.22      | 10.77     | 10.54     | 14.67     | 21.95     | 19.24     | 21.48     | 23.7  | 14.6-33.6  |
| Japan                          | 7.32      | 7.18      | 4.71      | 4.83      | 4.70      | 4.25      | 8.42      | -4.7  | -12.6-3.8  |
| Kuwait                         | 3.72      | 5.06      | 3.63      | 3.87      | 9.89      | 10.82     | 7.64      | 18.7  | 7.8-30.7   |
| Europe, Other                  |           |           |           |           |           |           |           |       |            |
| France                         | 23.60     | 29.91     | 27.43     | 24.65     | 27.35     | 32.60     | 31.57     | 3.2   | -1.2-7.7   |
| Germany                        | 27.93     | 38.42     | 55.72     | 36.99     | 27.75     | 26.54     | 49.75     | 4.1   | -13-24.5   |
| Italy                          | 18.70     | 24.30     | 25.87     | 27.20     | 59.78     | 47.93     | 16.88     | 21.6  | 7.4-37.6   |
| Slovakia                       | 21.93     | 29.57     | 35.41     | 36.92     | 57.11     | 55.04     | 64.61     | 19.8  | 8.3-32.4   |
| Slovenia                       | 20.58     | 18.13     | 21.57     | 41.54     | 45.14     | 37.80     | 59.42     | 15.3  | -2.3-36    |
| Spain                          | 15.64     | 5.93      | 18.25     | 13.97     | 30.98     | 30.39     | 14.07     | -3.8  | -40.4-55.1 |
| Switzerland                    | 51.67     | 27.71     | 40.72     | 49.63     | 24.59     | 32.80     | 33.91     | -20.7 | -42.1-8.5  |
| UK                             | 28.19     | 25.32     | 23.02     | 21.16     | 29.75     | 34.52     | 34.02     | 3.3   | -2.7-9.7   |
| Europe, Scandinavian Countries |           |           |           |           |           |           |           |       |            |
| Denmark                        | 34.96     | 47.73     | 53.70     | 57.01     | 42.86     | 56.72     | 52.31     | 5.9   | -2.7-15.3  |
| Iceland                        | 17.42     | 18.53     | 55.45     | 37.31     | 36.80     | 53.40     | 16.64     | 18.1  | -0.6-40.3  |
| Norway                         | 44.70     | 46.76     | 61.10     | 60.94     | 49.60     | 42.44     | 53.03     | 3.6   | -1.1-8.5   |
| Oceania                        |           |           |           |           |           |           |           |       |            |
| Australia                      | 21.40     | 22.38     | 24.68     | 28.44     | 32.44     | 36.34     | 38.75     | 11.3  | 9.7-13     |
| New Zealand                    | 32.12     | 18.10     | 18.77     | 26.32     | 24.00     | 35.71     | 39.03     | 5.9   | -1.9-14.4  |

Abbreviation: APPC, average period percentage change.

### Supplementary Table 5.1

Incidence rates (per 1,000,000 person-years) of lymphoma among adolescents aged 15-19 years during the period of 1978-2012 by gender.

|                                | 1978-1982 |        | 1983-1987 |        | 1988-1992 |        | 1993-1997 |        | 1998-2002 |        | 2003-2007 |        | 2008-2012 |        | APPC |        | 95% CI     |            |  |
|--------------------------------|-----------|--------|-----------|--------|-----------|--------|-----------|--------|-----------|--------|-----------|--------|-----------|--------|------|--------|------------|------------|--|
|                                | Male      | Female | Male | Female | Male       | Female     |  |
| Americas                       |           |        |           |        |           |        |           |        |           |        |           |        |           |        |      |        |            |            |  |
| USA                            | 53.99     | 51.95  | 59.08     | 49.57  | 57.66     | 55.39  | 51.29     | 46.24  | 48.85     | 47.29  | 53.16     | 44.98  | 48.85     | 50.16  | -2.4 | -2.3   | -5.3-0.6   | -4.7-0.1   |  |
| USA, Hawaii                    | 18.82     | 15.98  | 25.2      | 20.64  | 29.36     | 38.32  | 34.08     | 15.6   | 36.92     | 20.23  | 28.13     | 36.78  | 18.19     | 63.58  | 1.9  | 22.1   | -5.9-3     | 11.2-34.1  |  |
| Canada                         | 53.26     | 31.96  | 58.09     | 55.26  | 59.62     | 58.92  | 56.33     | 55.93  | 59.4      | 50.81  | 57.18     | 49.03  | 61.15     | 48.31  | 1.5  | 3.7    | -0.4-3.5   | 2-5.4      |  |
| Colombia                       | 36.34     | 14.97  | 24.04     | 16.82  | 26.24     | 7.11   | 27.81     | 9.14   | 35.13     | 28.73  | 30.97     | 18.88  | 31.26     | 24.22  | 1.6  | 9.6    | -5.7-9.5   | -0.6-20.9  |  |
| Asia                           |           |        |           |        |           |        |           |        |           |        |           |        |           |        |      |        |            |            |  |
| China                          | 15.83     | 8.81   | 15.36     | 13.34  | 14.5      | 14.76  | 12.12     | 8.6    | 16.75     | 13.11  | 25.94     | 24.67  | 22.97     | 16.63  | 9.5  | 22.6   | -3.8-24.7  | 3.2-45.7   |  |
| China, Hong Kong               | 25.22     | 15.67  | 37.21     | 22.73  | 35.47     | 26.18  | 31.59     | 13.55  | 34.34     | 19.89  | 27.03     | 19.67  | 28.15     | 24.96  | -1.1 | 3.4    | -6.8-5     | -3.4-10.7  |  |
| India                          | 18.03     | 8.84   | 23.02     | 10.24  | 23.92     | 11.77  | 18.98     | 6.7    | 19.45     | 9.82   | 14.08     | 9.41   | 18.81     | 9.24   | -3.1 | 3.7    | -11.9-6.5  | -5.3-13.5  |  |
| Israel                         | 43.3      | 42.28  | 56.26     | 41.44  | 54.45     | 45.18  | 74.87     | 75.58  | 65.85     | 79.33  | 76.96     | 70.89  | 60.54     | 64.89  | 7.5  | 10.5   | 0-15.6     | 3.1-18.3   |  |
| Japan                          | 13.51     | 9.95   | 14.75     | 10.94  | 16.14     | 12.05  | 16.51     | 9.28   | 16.94     | 9.31   | 14.88     | 11.1   | 26.4      | 14.7   | 8.5  | 5.3    | 4-13.3     | -0.6-11.7  |  |
| Kuwait                         | 48.38     | 30.38  | 20.24     | 16.47  | 36.27     | 36.25  | 30.94     | 37.1   | 49.44     | 56.25  | 34.63     | 54.12  | 68.77     | 42.15  | 6.9  | 5.7    | -11.4-28.9 | -19.1-38.1 |  |
| Europe, Other                  |           |        |           |        |           |        |           |        |           |        |           |        |           |        |      |        |            |            |  |
| France                         | 56.28     | 42.35  | 48.8      | 34.08  | 45.18     | 39.87  | 49.3      | 36.42  | 51.27     | 45.65  | 46.33     | 57.93  | 52        | 85.67  | -1   | 11.5   | -4.5-2.5   | 7.1-16     |  |
| Germany                        | 39.9      | 21.07  | 48.02     | 20.08  | 41.79     | 51.15  | 66.58     | 69.41  | 41.63     | 51.45  | 59.71     | 56.07  | 49.75     | 52.32  | 4.5  | 19     | -8.3-19.2  | -0.6-42.5  |  |
| Italy                          | 65.45     | 34.04  | 59.02     | 43.59  | 44.35     | 73.78  | 63.46     | 47.6   | 46.49     | 76.72  | 90.54     | 113.3  | 118.13    | 80.74  | 9.1  | 21.3   | -3.1-22.7  | 11.3-32.3  |  |
| Slovakia                       | 40.04     | 27.94  | 45.88     | 33.02  | 41.76     | 37.73  | 31.04     | 34.93  | 41.29     | 44.01  | 44.6      | 53.38  | 50.64     | 42.01  | 5.1  | 12.5   | -3.5-14.5  | 7.3-18     |  |
| Slovenia                       | 30.87     | 31.7   | 43.05     | 37.38  | 48.53     | 36.58  | 44.14     | 38.44  | 42.32     | 73.89  | 59.84     | 39.86  | 29.71     | 55.08  | 4.4  | 13     | -14.9-28.1 | 4.2-22.5   |  |
| Spain                          | 36.5      | 16.3   | 47.42     | 0      | 45.63     | 23.9   | 93.12     | 83.58  | 61.96     | 52.78  | 85.09     | 58.43  | 77.36     | 52.25  | 20.1 | 9.8    | 9.7-31.5   | 13.5-28.6  |  |
| Switzerland                    | 57.41     | 26.91  | 38.79     | 26.87  | 40.72     | 35.48  | 49.63     | 57.86  | 67.62     | 69.69  | 10.93     | 62.21  | 43.59     | 85.71  | 16.4 | 19.9   | -33.6-5.3  | 8.5-32.5   |  |
| UK                             | 36.73     | 26.65  | 45.21     | 29.29  | 33.98     | 39.97  | 52.27     | 39.16  | 32.23     | 44.63  | 46.43     | 56.43  | 52.41     | 43.51  | 6    | 9.2    | -0.2-12.5  | 6.3-12.3   |  |
| Europe, Scandinavian Countries |           |        |           |        |           |        |           |        |           |        |           |        |           |        |      |        |            |            |  |
| Denmark                        | 42.95     | 19.87  | 49.72     | 24.11  | 52.63     | 24.71  | 59.43     | 35.51  | 52.54     | 28.82  | 45.38     | 42.55  | 63.44     | 64.46  | 4.6  | 19.4   | -5.1-15.3  | 14.6-24.4  |  |
| Iceland                        | 8.71      | 18.31  | 74.14     | 0      | 55.45     | 19.27  | 130.57    | 77.49  | 110.4     | 38.25  | 89.01     | 74.98  | 83.19     | 17.47  | 31.3 | 27.8   | 27.8-35    | 6.6-52.9   |  |
| Norway                         | 32.28     | 15.7   | 24.55     | 31.99  | 49.88     | 35.19  | 50.78     | 40.97  | 48.14     | 44.52  | 54.37     | 51.67  | 55.44     | 55.06  | 5.1  | 20.3   | -14.5-29.3 | 18.5-22.2  |  |
| Oceania                        |           |        |           |        |           |        |           |        |           |        |           |        |           |        |      |        |            |            |  |
| Australia                      | 34.92     | 27.58  | 38.16     | 31.19  | 43.28     | 35.51  | 45.97     | 37.72  | 52.43     | 42.3   | 57.94     | 56.65  | 68.77     | 55.02  | 11.7 | 13.1   | 9.3-14.2   | 11-15.2    |  |
| New Zealand                    | 39.54     | 15.49  | 25.86     | 36.43  | 32.18     | 23.48  | 30.71     | 18.09  | 36.71     | 40.18  | 39.53     | 41.26  | 58.54     | 41.1   | 6.9  | 13     | 0.3-13.9   | -5.7-35.4  |  |

Abbreviation: APPC, average period percentage change.

## Supplementary Table 5.2

Incidence rates (per 1,000,000 person-years) of leukemia among adolescents aged 15-19 years during the period of 1978-2012 by gender.

|                                | 1978-1982 |        | 1983-1987 |        | 1988-1992 |        | 1993-1997 |        | 1998-2002 |        | 2003-2007 |        | 2008-2012 |        | APPC  |        | 95% CI     |            |
|--------------------------------|-----------|--------|-----------|--------|-----------|--------|-----------|--------|-----------|--------|-----------|--------|-----------|--------|-------|--------|------------|------------|
|                                | Male      | Female | Male  | Female | Male       | Female     |
| Americas                       |           |        |           |        |           |        |           |        |           |        |           |        |           |        |       |        |            |            |
| USA                            | 25.37     | 15.76  | 29.79     | 15.74  | 27.41     | 19.63  | 23.88     | 18.36  | 33.49     | 24.37  | 35.86     | 25.04  | 33.49     | 21.86  | 7.5   | 6.8    | 0.8-14.7   | 1.8-12.2   |
| USA, Hawaii                    | 42.35     | 0.00   | 0.00      | 20.64  | 5.87      | 25.55  | 34.08     | 20.80  | 23.07     | 25.29  | 46.88     | 42.04  | 13.64     | 24.45  | -6.8  | 10.1   | -19.2-7.4  | 0.1-21.1   |
| Canada                         | 25.06     | 14.85  | 31.13     | 22.68  | 24.96     | 20.03  | 27.62     | 18.36  | 30.08     | 19.32  | 30.11     | 20.31  | 36.87     | 21.74  | 4.2   | 3.1    | 0.3-8.3    | 2.7-3.5    |
| Colombia                       | 42.95     | 32.43  | 24.04     | 31.24  | 34.99     | 30.79  | 55.61     | 29.69  | 49.88     | 36.43  | 42.04     | 25.17  | 50.79     | 36.33  | -3.2  | -0.5   | -27.3-29   | -4.6-3.7   |
| Asia                           |           |        |           |        |           |        |           |        |           |        |           |        |           |        |       |        |            |            |
| China                          | 32.38     | 32.30  | 26.63     | 25.58  | 30.21     | 20.12  | 43.63     | 19.35  | 32.73     | 20.82  | 41.90     | 27.75  | 26.25     | 21.62  | -3.9  | -4.3   | -16.3-10.5 | -14.2-6.9  |
| China, Hong Kong               | 35.84     | 30.63  | 51.78     | 38.46  | 28.38     | 29.09  | 31.59     | 14.52  | 23.18     | 27.12  | 30.64     | 18.73  | 30.88     | 19.20  | -7.8  | -10.9  | -16.2-1.5  | -27.3-9.2  |
| India                          | 23.19     | 12.48  | 27.87     | 16.25  | 22.53     | 17.17  | 31.98     | 20.09  | 26.60     | 20.20  | 25.34     | 17.00  | 27.06     | 16.58  | 1.3   | 5.1    | -3.9-6.8   | 1.6-8.7    |
| Israel                         | 27.55     | 19.41  | 22.75     | 12.75  | 32.49     | 20.28  | 27.79     | 19.50  | 31.46     | 16.94  | 39.19     | 26.12  | 32.55     | 22.54  | 2.6   | -1.2   | -5.9-11.9  | -17-17.6   |
| Japan                          | 28.14     | 18.15  | 23.52     | 15.98  | 30.59     | 19.14  | 27.78     | 14.34  | 29.64     | 17.15  | 21.79     | 22.19  | 34.82     | 25.29  | -3.0  | 6.5    | -13.6-8.8  | -10.7-27.1 |
| Kuwait                         | 33.50     | 26.04  | 40.49     | 27.45  | 29.02     | 18.12  | 54.15     | 41.22  | 17.30     | 16.07  | 41.13     | 35.30  | 36.30     | 23.18  | 5.1   | 2.4    | -5.6-17.1  | -5.9-11.4  |
| Europe, Other                  |           |        |           |        |           |        |           |        |           |        |           |        |           |        |       |        |            |            |
| France                         | 19.97     | 18.41  | 25.19     | 17.85  | 24.20     | 14.95  | 15.84     | 14.57  | 42.73     | 17.56  | 34.32     | 36.86  | 37.14     | 24.75  | 14.4  | 4.9    | 4.5-25.2   | -4.8-15.7  |
| Germany                        | 3.99      | 12.64  | 19.21     | 30.11  | 13.93     | 29.23  | 66.58     | 7.71   | 34.69     | 7.35   | 13.27     | 21.03  | 71.07     | 37.37  | 49.9  | 10.8   | 3.3-117.4  | -4.1-28.1  |
| Italy                          | 37.40     | 48.63  | 62.49     | 14.53  | 55.43     | 31.06  | 81.60     | 23.80  | 19.93     | 34.87  | 26.63     | 11.33  | 33.75     | 17.94  | -5.8  | -42.8  | -27.1-21.6 | -69.4-6.7  |
| Slovakia                       | 22.88     | 18.96  | 15.29     | 11.72  | 23.61     | 18.87  | 20.14     | 12.23  | 24.60     | 11.00  | 36.06     | 22.74  | 36.67     | 29.23  | 12.8  | 7.5    | 4.7-21.6   | -6.1-23    |
| Slovenia                       | 24.01     | 10.57  | 22.66     | 14.02  | 26.96     | 25.32  | 28.56     | 16.47  | 36.68     | 26.60  | 44.10     | 26.57  | 52.00     | 27.54  | 14.8  | 22.2   | 12.6-16.9  | 11.9-33.4  |
| Spain                          | 26.07     | 32.61  | 17.78     | 30.86  | 13.69     | 4.78   | 18.62     | 19.67  | 24.78     | 13.20  | 18.23     | 32.46  | 28.13     | 14.93  | 2.0   | -7.1   | -9.7-15.2  | -18.6-6    |
| Switzerland                    | 34.44     | 26.91  | 16.63     | 16.12  | 46.53     | 5.91   | 28.36     | 7.23   | 24.59     | 6.34   | 10.93     | 39.59  | 4.84      | 10.08  | -34.1 | 0.1    | -56.3--0.6 | -53.8-117  |
| UK                             | 21.35     | 13.32  | 17.18     | 21.73  | 32.89     | 18.27  | 29.87     | 28.72  | 30.99     | 30.61  | 28.57     | 26.33  | 28.61     | 18.27  | 5.3   | 5.8    | -4.3-15.9  | -1.5-13.6  |
| Europe, Scandinavian Countries |           |        |           |        |           |        |           |        |           |        |           |        |           |        |       |        |            |            |
| Denmark                        | 25.97     | 18.82  | 24.86     | 22.01  | 20.41     | 17.97  | 29.11     | 19.03  | 22.12     | 15.85  | 37.81     | 21.28  | 31.16     | 12.89  | 1.4   | -4.3   | -5-8.2     | -16.9-10.3 |
| Iceland                        | 26.13     | 18.31  | 18.53     | 19.29  | 55.45     | 0.00   | 37.31     | 0.00   | 36.80     | 38.25  | 17.80     | 56.24  | 33.28     | 17.47  | -3.4  | 1.0    | -25-24.4   | 1.4-28.5   |
| Norway                         | 19.87     | 17.01  | 25.72     | 13.53  | 18.70     | 15.64  | 20.31     | 12.14  | 39.39     | 15.35  | 33.15     | 18.15  | 31.34     | 39.70  | 13.6  | 14.1   | 1.7-26.9   | -6.1-38.6  |
| Oceania                        |           |        |           |        |           |        |           |        |           |        |           |        |           |        |       |        |            |            |
| Australia                      | 28.73     | 19.36  | 28.99     | 19.64  | 33.62     | 22.05  | 35.45     | 21.73  | 36.59     | 25.69  | 37.78     | 24.17  | 41.89     | 26.58  | 5.4   | 4.7    | 2.1-8.8    | 2.2-7.3    |
| New Zealand                    | 22.24     | 23.23  | 36.20     | 24.29  | 37.54     | 22.10  | 35.10     | 16.58  | 46.60     | 17.86  | 44.64     | 25.29  | 45.13     | 34.68  | 10.8  | 3.1    | 3.5-18.6   | -3.1-9.6   |

Abbreviation: APPC, average period percentage change.

### Supplementary Table 5.3

Incidence rates (per 1,000,000 person-years) of thyroid cancer among adolescents aged 15-19 years during the period of 1978-2012 by gender.

|                                | 1978-1982 |        | 1983-1987 |        | 1988-1992 |        | 1993-1997 |        | 1998-2002 |        | 2003-2007 |        | 2008-2012 |        | APPC |        | 95% CI      |            |  |
|--------------------------------|-----------|--------|-----------|--------|-----------|--------|-----------|--------|-----------|--------|-----------|--------|-----------|--------|------|--------|-------------|------------|--|
|                                | Male      | Female | Male | Female | Male        | Female     |  |
| Americas                       |           |        |           |        |           |        |           |        |           |        |           |        |           |        |      |        |             |            |  |
| USA                            | 4.99      | 21.31  | 6.88      | 26.75  | 3.88      | 24.16  | 3.09      | 24.40  | 7.09      | 31.87  | 5.70      | 31.91  | 7.09      | 52.94  | 11.6 | 13.5   | -7.1-34     | 5.1-22.5   |  |
| USA, Hawaii                    | 14.12     | 26.63  | 0         | 27.53  | 0         | 51.1   | 9.74      | 41.61  | 9.23      | 15.18  | 18.75     | 21.02  | 13.64     | 29.35  | -0.2 | 2.6    | -7.1-7.3    | -9.8-16.7  |  |
| Canada                         | 6.27      | 16.36  | 4.45      | 21.52  | 3.88      | 22.35  | 7.31      | 25.81  | 5.26      | 30.7   | 10.74     | 36.9   | 12.83     | 42.27  | 13.9 | 16.2   | -2.7-33.2   | 14.9-17.6  |  |
| Colombia                       | 3.3       | 9.98   | 6.01      | 9.61   | 2.92      | 7.11   | 0         | 11.42  | 2.11      | 17.52  | 2.21      | 20.98  | 1.95      | 34.31  | 21.7 | 21.7   | -20.1--8.6  | 14.7-29.2  |  |
| Asia                           |           |        |           |        |           |        |           |        |           |        |           |        |           |        |      |        |             |            |  |
| China                          | 2.16      | 5.87   | 1.02      | 11.12  | 3.63      | 10.73  | 6.06      | 16.13  | 2.28      | 14.65  | 4.99      | 32.89  | 18.05     | 49.89  | 27.2 | 42     | -13.4-87.1  | 21.7-65.6  |  |
| China, Hong Kong               | 5.31      | 12.11  | 2.43      | 15.73  | 4.43      | 27.15  | 3.61      | 34.84  | 6.01      | 21.69  | 3.6       | 27.16  | 8.17      | 40.31  | 9.8  | 23.5   | -10.8-35.2  | 13.6-34.3  |  |
| India                          | 0.86      | 2.6    | 1.21      | 4.94   | 1.11      | 3.18   | 0.52      | 3.96   | 1.79      | 4.49   | 1.81      | 3.66   | 1.69      | 8.97   | 16   | 24.8   | 3.2-30.4    | -5.2-64.3  |  |
| Israel                         | 4.59      | 15.25  | 2.39      | 15.3   | 2.63      | 27.66  | 11.58     | 29.26  | 7.32      | 27.73  | 5.7       | 30.59  | 11.72     | 34.15  | 14.7 | 15.3   | -1.5-33.5   | 8.2-22.8   |  |
| Japan                          | 1.13      | 6.44   | 0.8       | 6.73   | 1.68      | 7.09   | 2.42      | 11.39  | 2.82      | 8.33   | 2.66      | 18.31  | 2.25      | 17.06  | 2.6  | 16.9   | -25.1-40.6  | 7.1-27.5   |  |
| Kuwait                         | 11.17     | 17.36  | 2.53      | 0      | 0         | 14.5   | 3.87      | 45.34  | 2.47      | 5.36   | 8.66      | 7.06   | 1.91      | 18.97  | 2.8  | 2.8    | -48-89.2    | -15.3-24.7 |  |
| Europe, Other                  |           |        |           |        |           |        |           |        |           |        |           |        |           |        |      |        |             |            |  |
| France                         | 0         | 5.52   | 3.15      | 8.11   | 1.61      | 9.97   | 5.28      | 20.03  | 5.13      | 26.34  | 15.44     | 31.6   | 5.57      | 30.46  | 34.1 | 34.1   | 14.9-59     | 22-47.4    |  |
| Germany                        | 3.99      | 8.43   | 4.8       | 10.04  | 0         | 14.62  | 0         | 30.85  | 0         | 7.35   | 6.63      | 0      | 14.21     | 0      | 24.8 | 24.8   | 13.9-26.8   | 3.7-50.2   |  |
| Italy                          | 0         | 14.59  | 3.47      | 7.27   | 7.39      | 7.77   | 9.07      | 33.32  | 6.64      | 0      | 10.65     | 22.66  | 12.66     | 62.8   | 29.1 | 29.1   | -100-       | -0.4-67.2  |  |
| Slovakia                       | 1.91      | 2.99   | 0         | 4.26   | 3.63      | 8.49   | 5.03      | 10.48  | 7.03      | 19.26  | 4.74      | 15.82  | 6.99      | 25.57  | 46.6 | 46.6   | 18.9-38.9   | 35.9-58.2  |  |
| Slovenia                       | 0         | 17.61  | 4.53      | 4.67   | 5.39      | 5.63   | 2.6       | 10.98  | 16.93     | 14.78  | 6.3       | 29.89  | 3.71      | 51.15  | 24.7 | 24.7   | -5.7-60.9   | 17-32.9    |  |
| Spain                          | 0         | 16.3   | 5.93      | 30.86  | 4.56      | 28.69  | 0         | 29.5   | 0         | 13.2   | 18.23     | 19.48  | 7.03      | 22.39  | -2.1 | -2.1   | 1.8-39.3    | -19.4-18.8 |  |
| Switzerland                    | 0         | 16.14  | 0         | 16.12  | 0         | 11.83  | 0         | 14.47  | 0         | 6.34   | 10.93     | 22.62  | 0         | 20.17  | 1.7  | 1.7    | 8.5-30333.6 | -6.7-10.8  |  |
| UK                             | 0.85      | 7.11   | 4.52      | 6.61   | 1.1       | 4.57   | 2.49      | 11.75  | 3.72      | 12.75  | 1.19      | 15.05  | 4.92      | 15.8   | 14.7 | 14.8   | -22.5-69.6  | 12.9-16.6  |  |
| Europe, Scandinavian Countries |           |        |           |        |           |        |           |        |           |        |           |        |           |        |      |        |             |            |  |
| Denmark                        | 2         | 4.18   | 0.99      | 11.53  | 3.22      | 3.37   | 3.64      | 7.61   | 6.91      | 8.64   | 2.52      | 13.3   | 3.34      | 14.06  | 6.5  | 15.4   | -30.8-63.9  | 7.7-23.7   |  |
| Iceland                        | 0         | 9.15   | 0         | 0      | 0         | 38.54  | 0         | 38.75  | 0         | 38.25  | 0         | 93.73  | 0         | 0      | 58   | 58.0   | 0-0         | 44.9-72.2  |  |
| Norway                         | 3.73      | 10.47  | 2.34      | 9.84   | 3.74      | 15.64  | 4.35      | 15.17  | 4.38      | 19.96  | 2.65      | 15.36  | 2.41      | 12.81  | 13.7 | 6.0    | -34.3-13.3  | -5-18.3    |  |
| Oceania                        |           |        |           |        |           |        |           |        |           |        |           |        |           |        |      |        |             |            |  |
| Australia                      | 2.25      | 15.84  | 2.94      | 13.86  | 3.22      | 9.35   | 4.67      | 16.4   | 5.66      | 20.56  | 7.56      | 21.9   | 8.03      | 26.95  | 25.9 | 9.9    | 22.3-29.6   | 6.9-13.1   |  |
| New Zealand                    | 1.24      | 7.74   | 3.88      | 10.8   | 4.02      | 8.29   | 2.92      | 4.52   | 2.82      | 23.81  | 1.28      | 15.97  | 4.88      | 12.84  | 14.3 | 18.1   | -13.7-51.4  | 2.2-36.6   |  |

Abbreviation: APPC, average period percentage change.

### Supplementary Table 5.4

Incidence rates (per 1,000,000 person-years) of CNS tumor among adolescents aged 15-19 years during the period of 1978-2012 by gender.

|                                | 1978-1982 |        | 1983-1987 |        | 1988-1992 |        | 1993-1997 |        | 1998-2002 |        | 2003-2007 |        | 2008-2012 |        | APPC  |        | 95% CI     |            |  |
|--------------------------------|-----------|--------|-----------|--------|-----------|--------|-----------|--------|-----------|--------|-----------|--------|-----------|--------|-------|--------|------------|------------|--|
|                                | Male      | Female | Male  | Female | Male       | Female     |  |
| Americas                       |           |        |           |        |           |        |           |        |           |        |           |        |           |        |       |        |            |            |  |
| USA                            | 20.16     | 15.1   | 24.19     | 18.96  | 27.67     | 19.66  | 19.45     | 17.40  | 22.06     | 14.56  | 22.78     | 18.50  | 22.06     | 18.48  | 0.1   | 1.8    | -3.2-3.6   | -5.1-9.1   |  |
| USA, Hawaii                    | 9.41      | 5.33   | 37.80     | 6.88   | 11.74     | 6.39   | 14.61     | 20.80  | 13.84     | 15.18  | 23.44     | 5.25   | 18.19     | 9.78   | -31.8 | 21.4   | -30.3-     | 0.9-46     |  |
| Canada                         | 24.34     | 15.35  | 24.46     | 18.03  | 21.91     | 19.45  | 20.31     | 14.05  | 18.05     | 16.67  | 21.94     | 15.35  | 24.96     | 22.46  | -0.9  | 7.1    | -3.9-2.1   | -1.3-16.3  |  |
| Colombia                       | 13.22     | 7.48   | 9.02      | 14.42  | 5.83      | 7.11   | 19.46     | 4.57   | 16.86     | 18.22  | 11.06     | 6.29   | 15.63     | 8.07   | -2.0  | 0.2    | -21.5-22.2 | -40.9-69.8 |  |
| Asia                           |           |        |           |        |           |        |           |        |           |        |           |        |           |        |       |        |            |            |  |
| China                          | 15.83     | 10.28  | 13.32     | 15.57  | 24.17     | 13.42  | 16.97     | 10.75  | 23.60     | 20.82  | 24.94     | 20.56  | 6.56      | 9.98   | 0.5   | 6.9    | -15.1-19   | -22.6-47.8 |  |
| China, Hong Kong               | 12.61     | 7.12   | 14.56     | 12.24  | 15.08     | 17.45  | 26.18     | 12.58  | 18.89     | 9.04   | 17.12     | 10.30  | 26.33     | 6.72   | 13.1  | -1.8   | 6.7-19.9   | -11.1-8.5  |  |
| India                          | 8.59      | 5.72   | 7.88      | 8.12   | 10.57     | 8.27   | 8.58      | 9.44   | 11.62     | 8.70   | 12.67     | 8.37   | 10.36     | 8.16   | 3.4   | 4.8    | -4.5-12    | 3.5-6.1    |  |
| Israel                         | 24.27     | 21.49  | 26.94     | 17.85  | 18.44     | 17.52  | 20.84     | 15.44  | 19.75     | 19.25  | 19.24     | 26.86  | 22.79     | 15.03  | -0.7  | -3.2   | -8.1-7.2   | -11.1-5.5  |  |
| Japan                          | 10.13     | 7.03   | 12.76     | 6.31   | 11.77     | 11.34  | 12.48     | 6.33   | 12.23     | 8.82   | 14.35     | 10.54  | 13.48     | 5.88   | 3.8   | -1.3   | -0.3-8.1   | -12.8-11.7 |  |
| Kuwait                         | 7.44      | 17.36  | 12.65     | 2.75   | 18.14     | 7.25   | 11.60     | 12.37  | 9.89      | 10.71  | 4.33      | 4.71   | 9.55      | 2.11   | -1.2  | -39.2  | -22.4-25.7 | -70.9-27.3 |  |
| Europe, Other                  |           |        |           |        |           |        |           |        |           |        |           |        |           |        |       |        |            |            |  |
| France                         | 21.78     | 20.25  | 22.04     | 9.74   | 20.98     | 13.29  | 14.08     | 18.21  | 11.96     | 19.31  | 10.30     | 8.78   | 7.43      | 15.23  | -17   | -19.6  | -20-13.8   | -45.5-18.8 |  |
| Germany                        | 11.97     | 16.85  | 24.01     | 20.08  | 34.82     | 7.31   | 14.79     | 30.85  | 20.81     | 0.00   | 26.54     | 35.04  | 14.21     | 0.00   | 3.6   | 17.3   | -18.8-32   | 7.8-27.8   |  |
| Italy                          | 32.72     | 9.73   | 10.42     | 14.53  | 22.17     | 15.53  | 36.26     | 19.04  | 0.00      | 13.95  | 21.30     | 5.66   | 0.00      | 31.40  | 19.8  | 23.4   | 16.3-23.5  | 2.5-48.7   |  |
| Slovakia                       | 15.25     | 11.98  | 23.45     | 23.44  | 24.51     | 18.87  | 26.85     | 27.07  | 11.42     | 18.34  | 17.08     | 11.86  | 34.93     | 25.57  | 4.9   | 2.4    | -21.9-40.8 | -18.8-29.2 |  |
| Slovenia                       | 3.43      | 7.05   | 20.39     | 9.34   | 26.96     | 2.81   | 15.58     | 8.24   | 28.22     | 5.91   | 28.35     | 9.96   | 22.28     | 7.87   | 23.7  | 10.3   | 1.1-51.4   | -8.8-33.5  |  |
| Spain                          | 10.43     | 5.43   | 23.71     | 49.38  | 13.69     | 19.12  | 27.94     | 24.58  | 18.59     | 26.39  | 18.23     | 25.97  | 14.07     | 29.86  | 0.8   | 43.5   | -5.8-8     | -51.3-323  |  |
| Switzerland                    | 17.22     | 10.76  | 16.63     | 21.50  | 23.27     | 11.83  | 14.18     | 7.23   | 24.59     | 12.67  | 10.93     | 0.00   | 9.69      | 20.17  | -4.1  | 6.4    | -12.1-4.6  | -0.5-13.8  |  |
| UK                             | 16.23     | 14.21  | 20.80     | 11.34  | 24.12     | 17.13  | 16.18     | 19.58  | 17.36     | 8.93   | 14.28     | 10.03  | 17.99     | 11.19  | 1.1   | -4.6   | -3.9-6.5   | -12.6-4.2  |  |
| Europe, Scandinavian Countries |           |        |           |        |           |        |           |        |           |        |           |        |           |        |       |        |            |            |  |
| Denmark                        | 24.97     | 19.87  | 29.83     | 26.20  | 20.41     | 14.60  | 33.96     | 24.10  | 15.21     | 11.53  | 18.91     | 21.28  | 8.90      | 17.58  | -11.8 | -4.2   | -25.7-4.8  | -19.8-14.5 |  |
| Iceland                        | 43.55     | 18.31  | 55.60     | 38.58  | 18.48     | 0.00   | 18.65     | 19.37  | 18.40     | 0.00   | 35.60     | 0.00   | 0.00      | 0.00   | -14.1 | -50.8  | -27.1-1.1  | -81.2-29   |  |
| Norway                         | 19.87     | 28.79  | 42.08     | 19.69  | 21.20     | 16.94  | 23.21     | 36.41  | 18.97     | 19.96  | 43.76     | 37.71  | 20.49     | 8.96   | 0.7   | -12.2  | -27.5-39.6 | -31.6-12.6 |  |
| Oceania                        |           |        |           |        |           |        |           |        |           |        |           |        |           |        |       |        |            |            |  |
| Australia                      | 28.16     | 25.82  | 20.55     | 15.02  | 22.53     | 16.82  | 16.75     | 19.27  | 19.24     | 15.42  | 17.99     | 13.97  | 20.25     | 15.14  | -5.2  | -5.8   | -8.7--1.5  | -11.2--0.2 |  |
| New Zealand                    | 34.59     | 28.39  | 21.98     | 21.59  | 14.75     | 9.67   | 24.86     | 10.55  | 12.71     | 16.37  | 12.75     | 18.63  | 10.98     | 14.13  | -14.9 | -7.8   | -24.9--3.6 | -26.4-15.5 |  |

Abbreviations: APPC, average period percentage change; CNS, central nervous system.
